# Supplementary material for: Placental methylome reveals a 22q13.33 brain regulatory gene locus associated with autism
Source: PubMed Central journal article supplement (PMC8848662; doi:10.1186/s13059-022-02613-1), 2022-02-16
Supplement: 13059_2022_2613_MOESM3_ESM.pdf [file 13059_2022_2613_MOESM3_ESM.pdf]

## Supplementary Figures

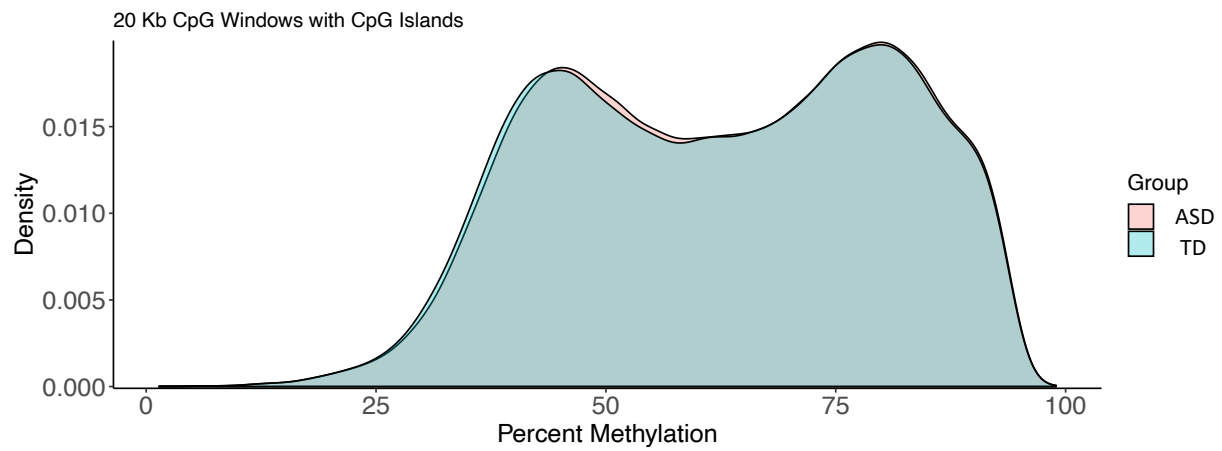

**Figure S1.** No global methylation difference was observed between ASD and TD comparing methylation levels over 20 kb windows. Results are shown as a density plot of average percent smoothed methylation for CpGs in the discovery group.

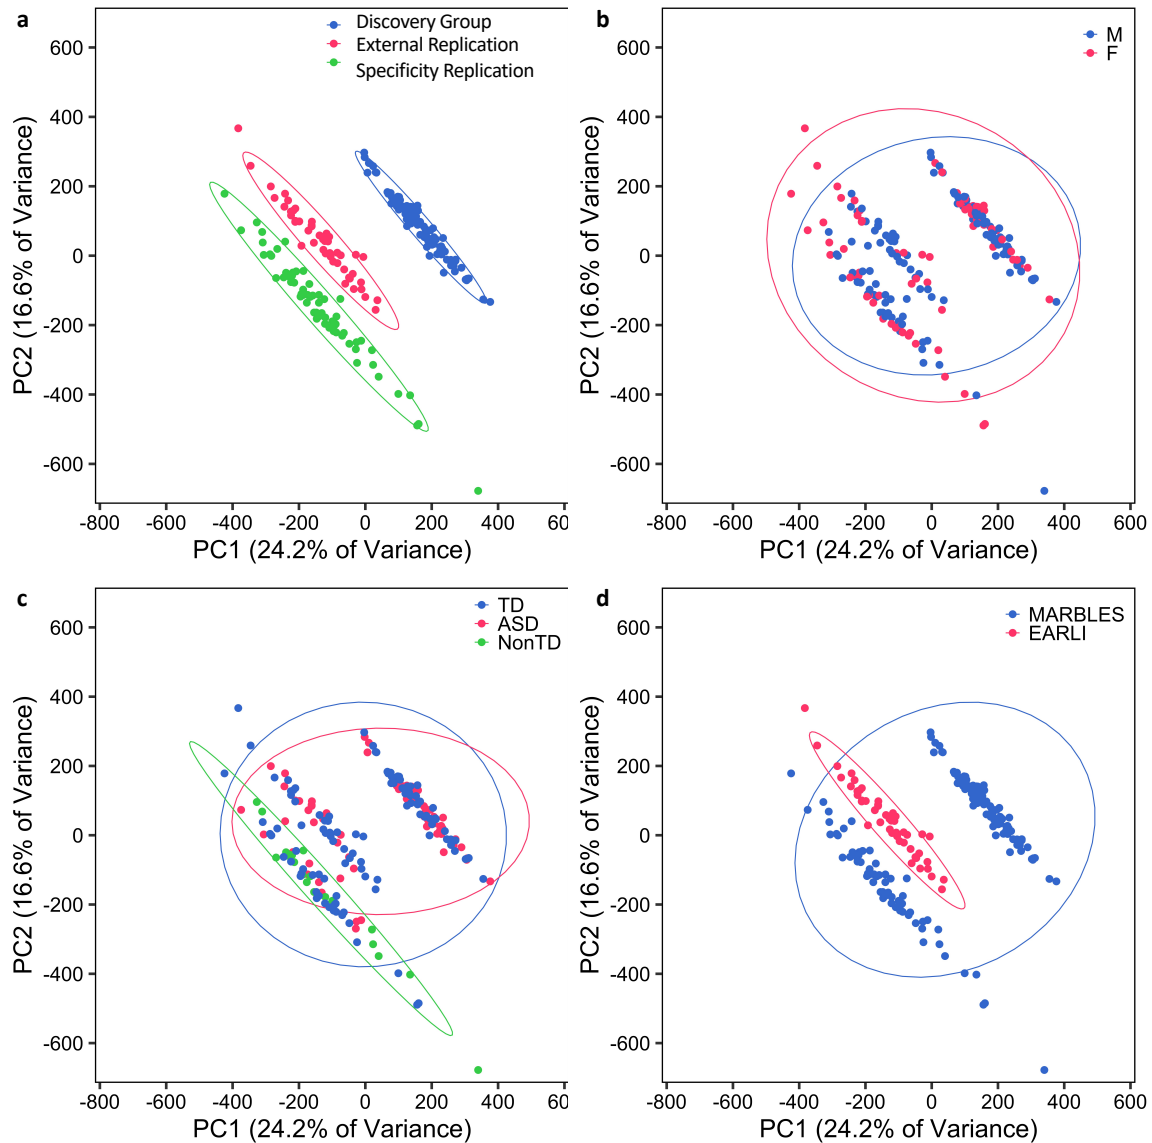

**Figure S2.** Sequencing platform (HiSeq 4000 vs HiSeq X vs NovaSeq) of each group of samples has a larger effect on methylation levels over 20 kb windows than ASD diagnosis, sex, or study. PCA plots show percent methylation at 20 kb windows across the genome for each sample. Points were colored by group, sex, diagnosis, or study. Ellipses indicate 95% confidence limits. Discovery group: MARBLES, HiSeq X; External Replication group: EARLI, HiSeq 4000; Specificity Replication group: MARBLES, NovaSeq

**a**

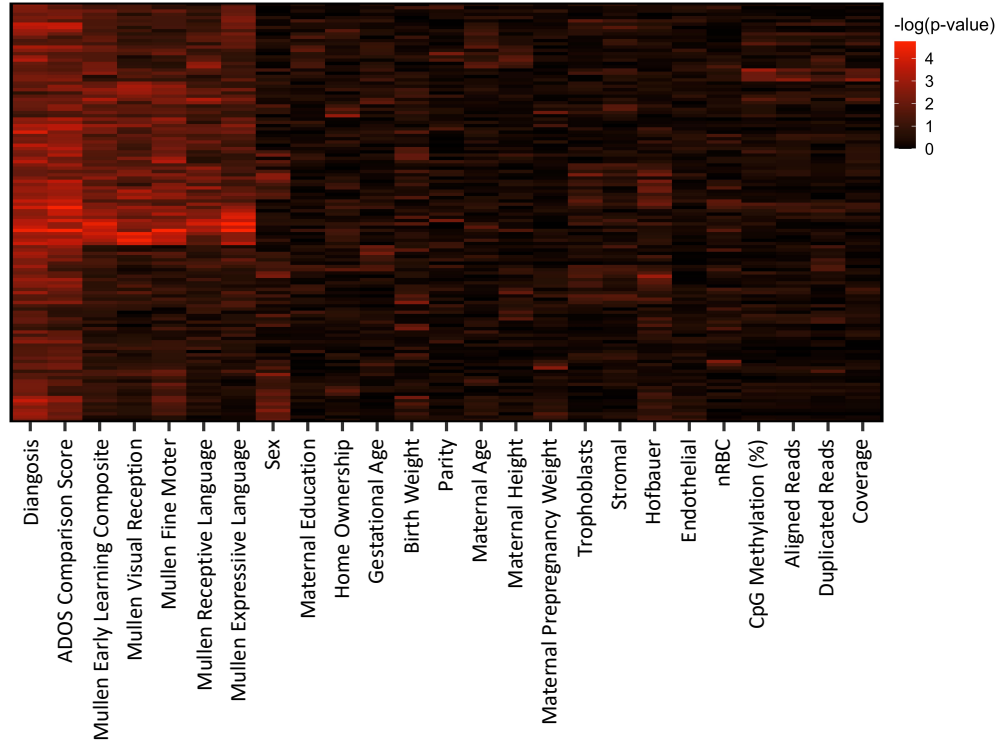

**b**

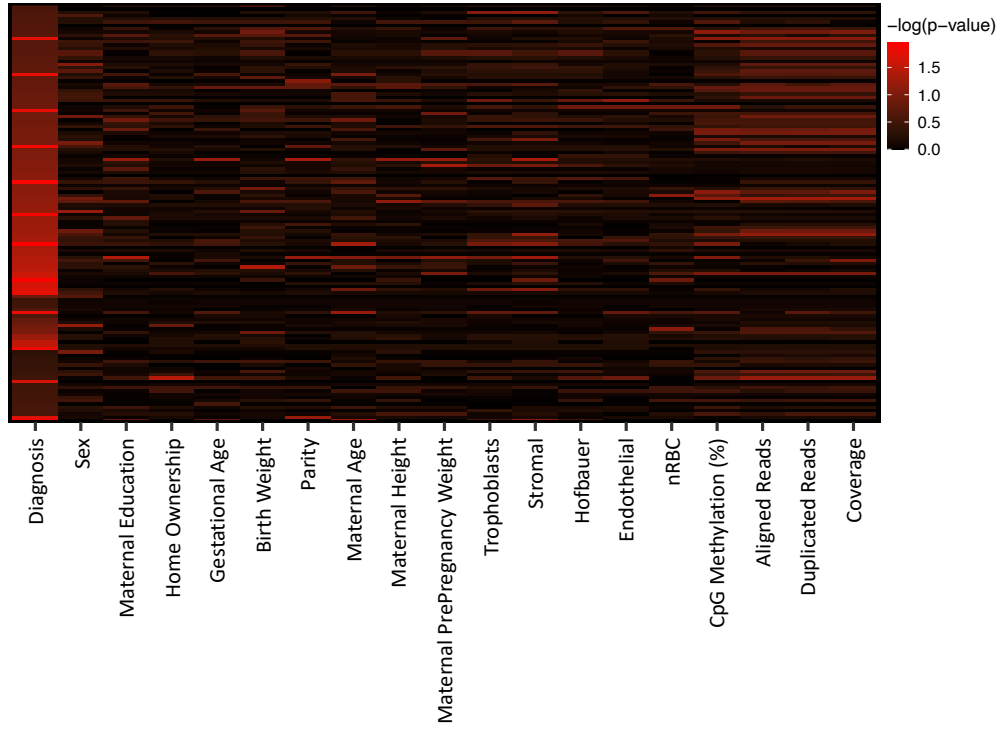

c

|                               | p.val (22q_smooth) |
|-------------------------------|--------------------|
| Diagnosis                     | 0.002              |
| Sex                           | 0.572              |
| Material Education            | 0.303              |
| Home Ownership                | 0.274              |
| Gestational Age               | 0.776              |
| Birth Weight                  | 0.126              |
| Parity                        | 0.621              |
| MaternalAge                   | 0.957              |
| Maternal Height               | 0.394              |
| Maternal Pre-Pregnancy Weight | 0.273              |
| Trophoblast cells             | 0.706              |
| Stromal Cells                 | 0.333              |
| Hofbauer Cells                | 0.290              |
| Endothelial Cells             | 0.517              |
| Nucleated Red Blood Cells     | 0.151              |
| Global CpG Methylation        | 0.274              |
| Aligned Reads                 | 0.540              |
| Duplicated Reads              | 0.445              |
| Coverage                      | 0.481              |

**Figure S3.** Methylation levels at ASD DMRs and 22q13.33 block are specifically associated with ADOS followed by cognitive behavioral outcomes (Mullen) but independent of other demographic or technical variables.

(a) Smoothed methylation values at ASD diagnosis associated DMRs were compared with behavioral, demographic, and technical variables. Significance testing was performed using linear regression.

(b) Linear regression models were fitted between smoothed methylation values of each ASD associated DMR with diagnosis, and other potential covariates (sex, maternal education, home ownership, gestational age, birth weight, parity, maternal age, maternal height, maternal pre-pregnancy weight, trophoblast cells, stromal cells, Hofbauer cells, endothelial cells, nucleated red blood cells, global CpG methylation, aligned reads, duplicated reads, and coverage). P values were adjusted for the number of variables within each linear regression model using FDR method.

(c) A multivariable linear regression model was fitted between average smooth methylation values over the 22q13.33 hypomethylated block and compared with other covariates (sex, maternal education, home ownership, gestational age, birth weight, parity, maternal age, maternal height, maternal pre-pregnancy weight, trophoblast cells, stromal cells, Hofbauer cells, endothelial cells, nucleated red blood cells, global CpG methylation, aligned reads, duplicated reads, and coverage). (Model:  $\text{lm}(22q\_smooth \sim \text{sex} + \text{maternal education} + \text{home ownership} + \text{gestational age} + \text{birth weight} + \text{parity} + \text{maternal age} + \text{maternal height} + \text{maternal pre-pregnancy weight} + \text{trophoblast cells} + \text{stromal cells} + \text{Hofbauer cells} + \text{endothelial cells} + \text{nucleated red blood cells} + \text{global CpG methylation} + \text{aligned reads} + \text{duplicated reads} + \text{coverage})$ ).



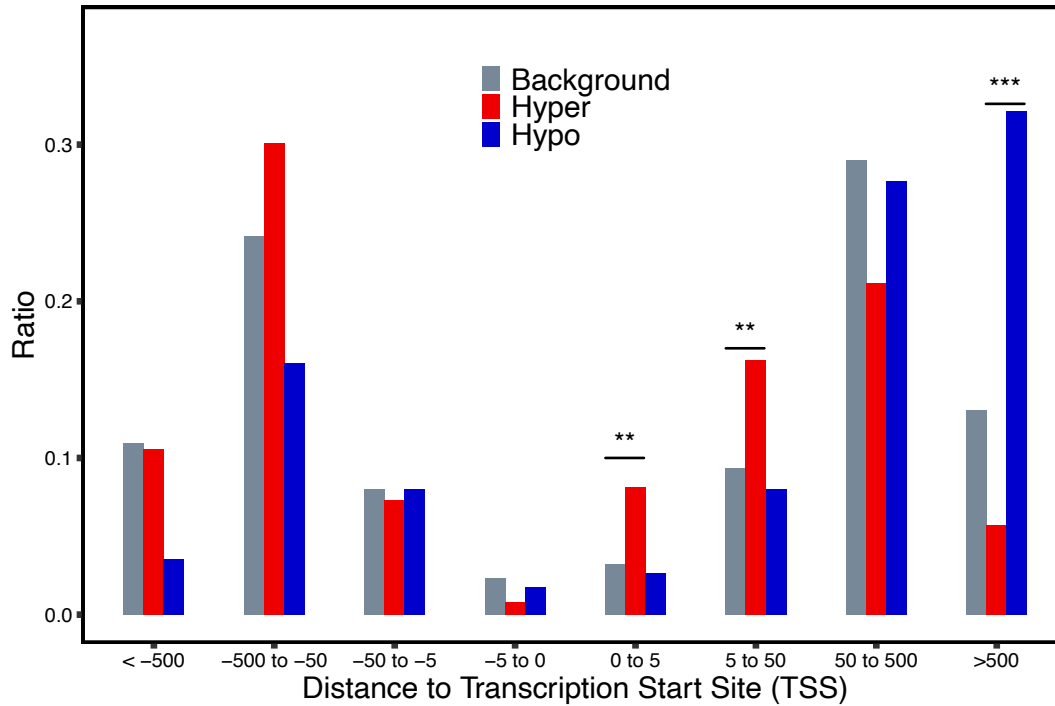

**Figure S4.** ASD associated DMRs were enriched at 5 kb and 5 – 50 kb downstream of TSS's compared to background regions.

Locations relative to genes for hypermethylated (red) and hypomethylated (blue) ASD DMRs compared to background regions (grey). Distributions of locations relative to transcription start sites (TSS). The ratio was plotted based on the number of genes at each binned location divided by the total number of genes. Significance levels were calculated using Fisher's exact test. (\*  $p$ -value < 0.05, \*\*  $p$ -value < 0.01, \*\*\*  $p$ -value < 0.001).

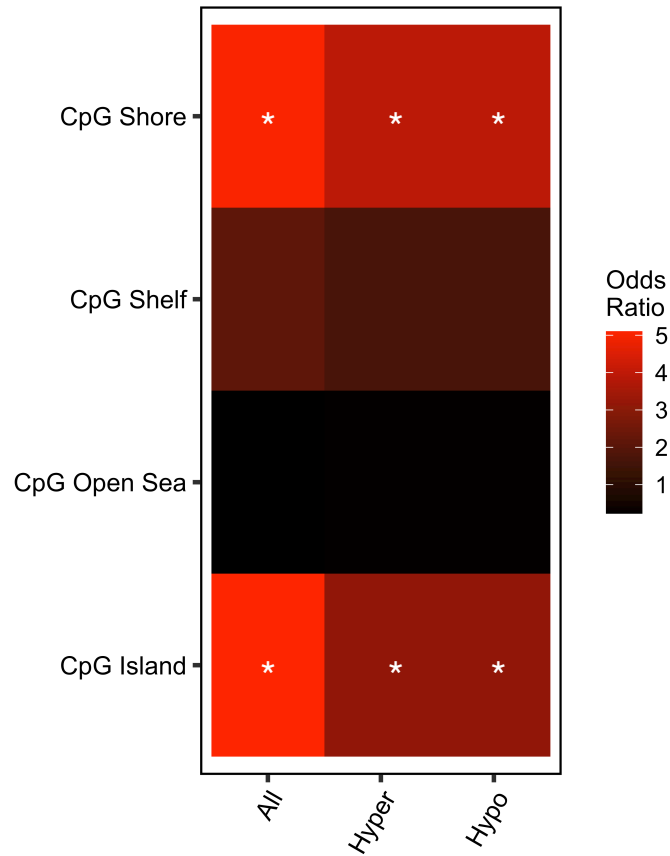

**Figure S5.** ASD DMRs were enriched at CpG islands and CpG shores. ASD DMRs (categorized as all, hypermethylated, or hypomethylated in ASD) were tested for enrichment based on CpG island location. Asterisks (\*) indicate significant enrichment compared to background regions using the LOLA R package with Fisher's exact test after FDR correction.

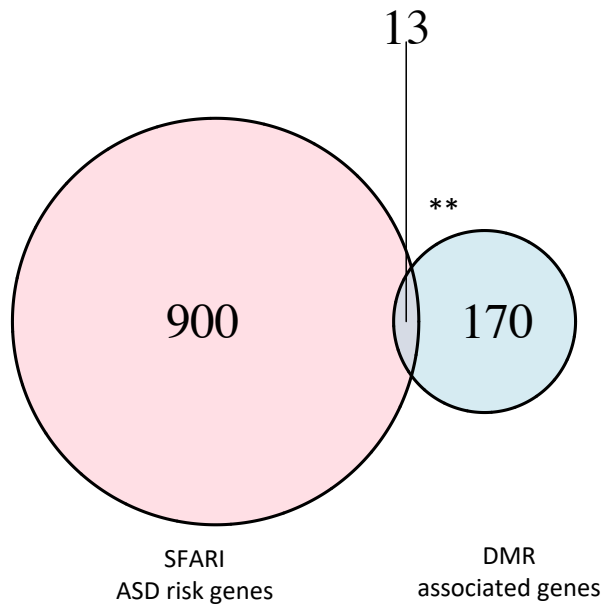

**Figure S6.** ASD DMR associated genes significantly overlapped with SFARI ASD genes (Fisher's exact test,  $p$ -value < 0.01). Gene overlaps were tested for significance using Fisher's exact test in the GeneOverlap R package compared to background regions.

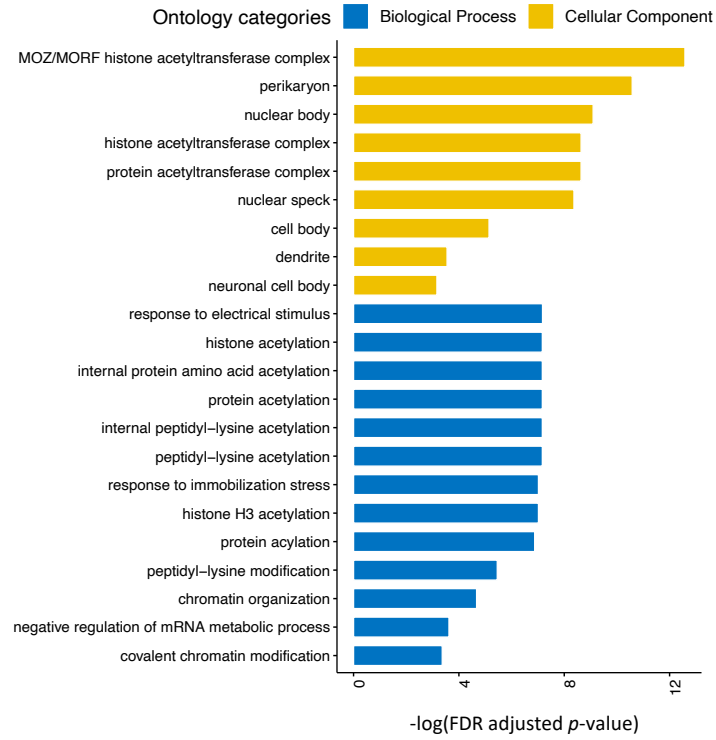

**Figure S7.** ASD DMRs were enriched for genes with histone acetyltransferase and chromatin modification functions.

Bar graph represents GREAT gene ontology and pathway enrichment analysis of ASD DMR annotated genes compared to background region annotated genes using Fisher's exact test (FDR adjusted *p*-value).

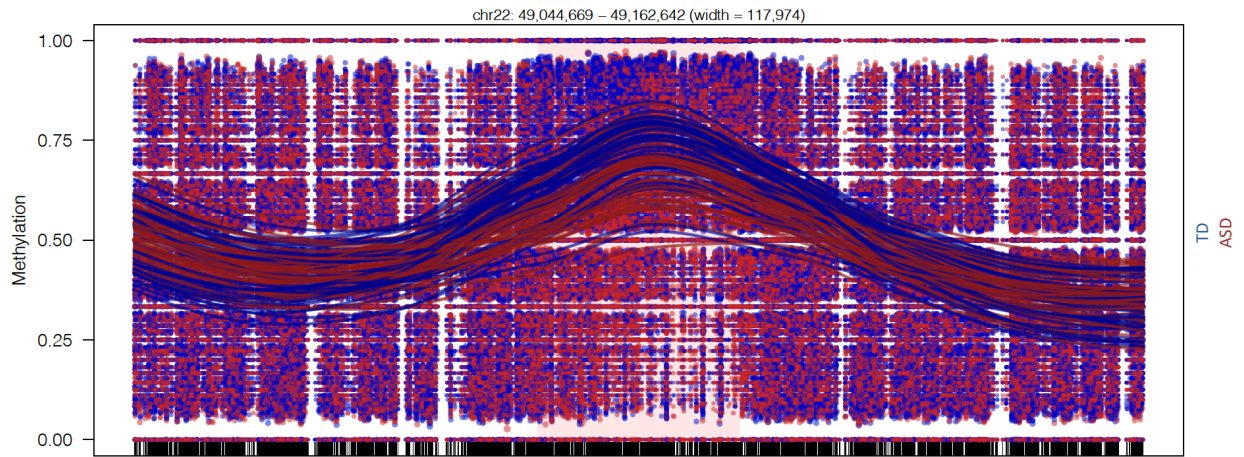

**Figure S8.** 22q13.33 co-methylated block identified as hypomethylated in ASD. The lines represent individual smoothed methylation levels estimated for ASD (red) or TD (blue). The dots represent the methylation level estimated at individual CpGs for each sample.

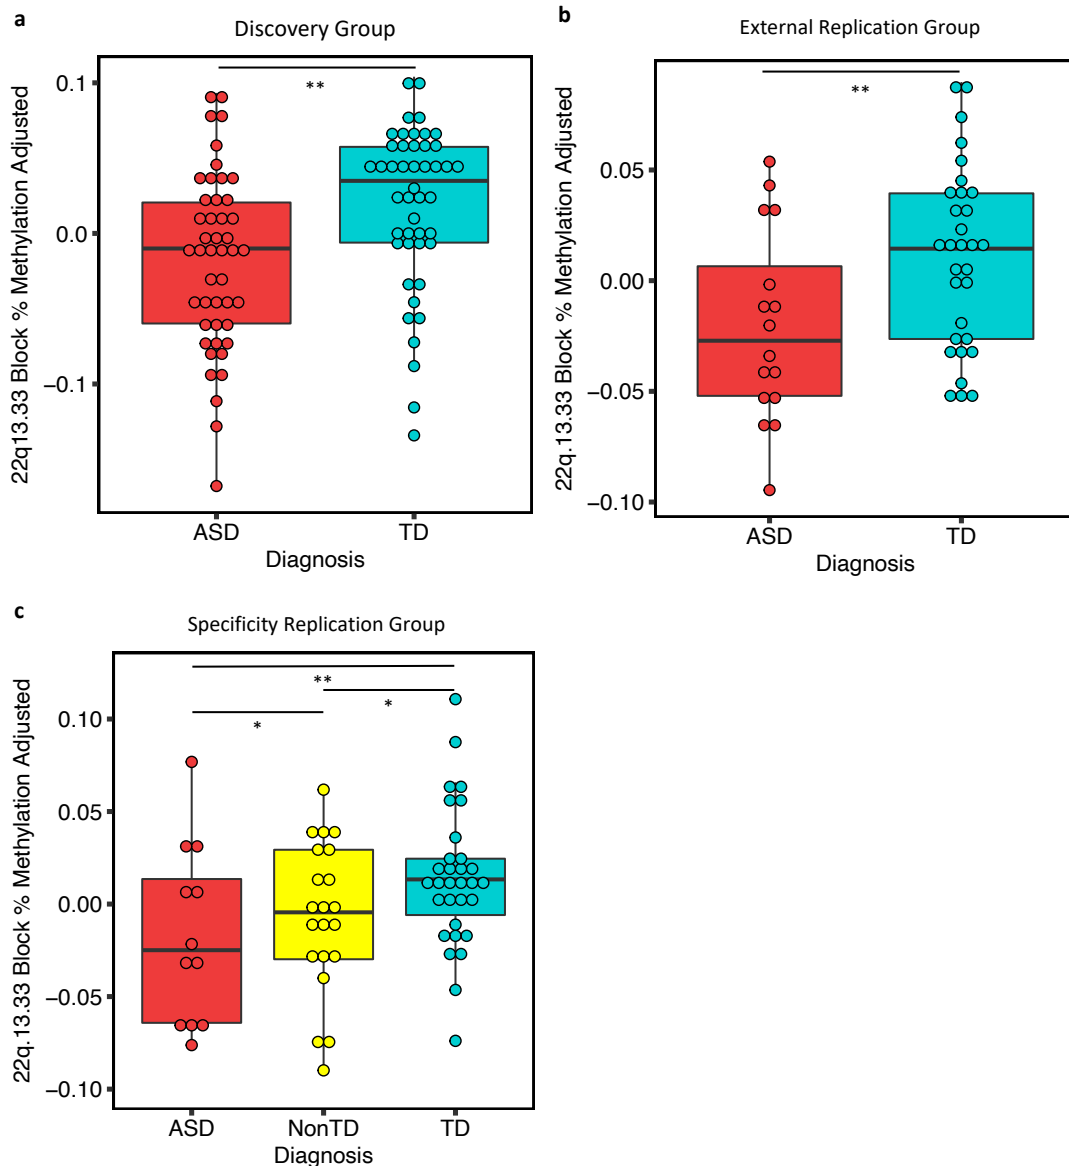

**Figure S9.** Smoothed methylation values (y-axis) were averaged over the 22q13.33 block with adjustment for potential covariates, birthweight and nucleated red blood cells (nRBC), and compared across diagnosis group (x-axis).

(a) ASD samples had significantly lower methylation compared to TD samples in the discovery group (MARBLEs, HiSeq X, ASD n = 46, TD n = 46) ( $p$ -value = 0.003).

(b) In the external replication group, ASD samples also had significantly lower methylation than TD group (EARLI, HiSeq 2500, ASD n = 16, TD n = 31) ( $p$ -value = 0.0098).

(c) For the specificity replication group (MARBLEs, NovaSeq, ASD n = 21, Non-TD n = 13, TD n = 31), ASD methylation levels were also significantly lower than both TD ( $p$ -value = 0.004) and Non-TD ( $p$ -value = 0.0496), while Non-TD was significantly lower than TD samples ( $p$ -value = 0.0494).

Box plot center lines, box limits, and whiskers represented median, interquartiles range, and minimum and maximum values.

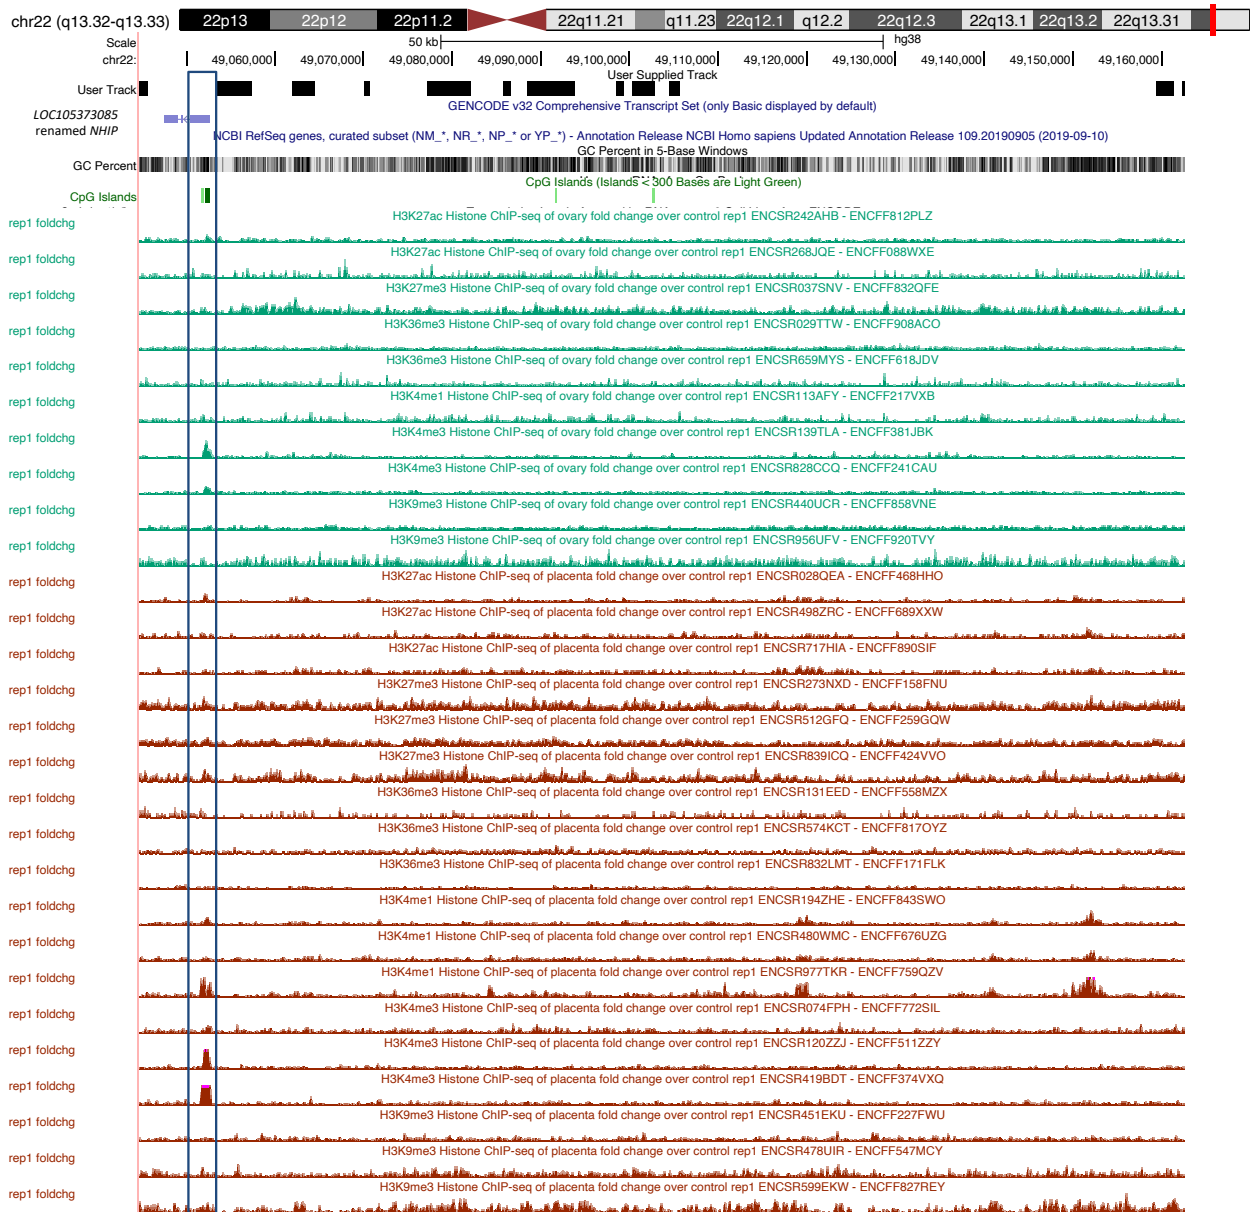

**Figure S10.** H3K4me3 peaks were observed at 22q13.33 co-methylated block. Histone post-translational modifications (PTMs) markers for ovary and placenta were extracted from ENCODE data [1,2] at the 22q13.33 co-methylated block region using the UCSC genome browser. Black box illustrates the H3K4me3 peak observed on the CpG island at the TSS of *NHP*.

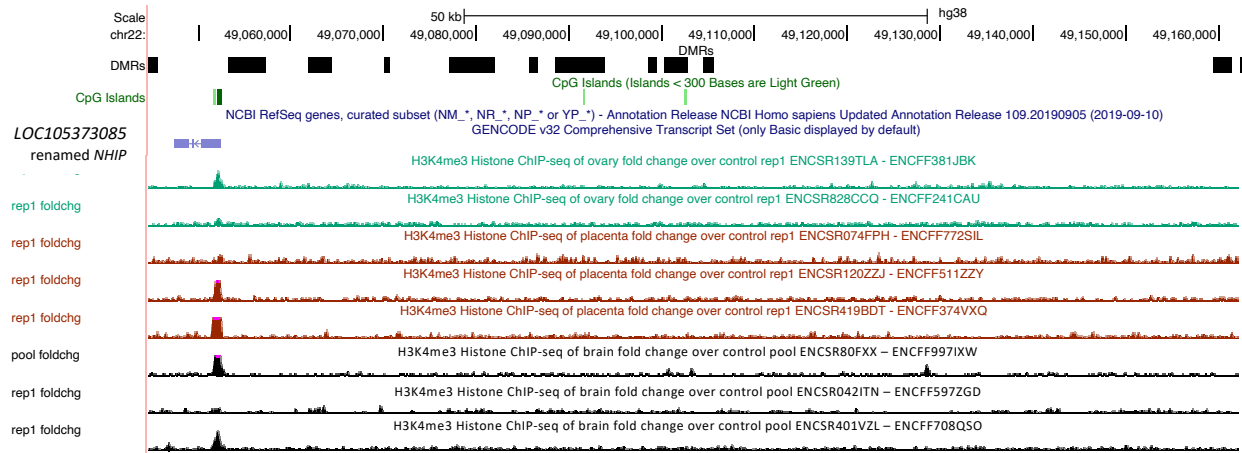

**Figure S11.** The H3K4me3 peak at the TSS of *NHIP* appears to be polymorphic among individuals in ovary, placenta, and brain.

H3K4me3 peaks from multiple individuals for ovary, placenta, and brain were extracted from ENCODE data [106] at the 22q13.33 co-methylated block region using the UCSC genome browser. There was variability in the existence of the H3K4me3 peak among individuals.



### GTEX RNA-seq data on *NHIP*

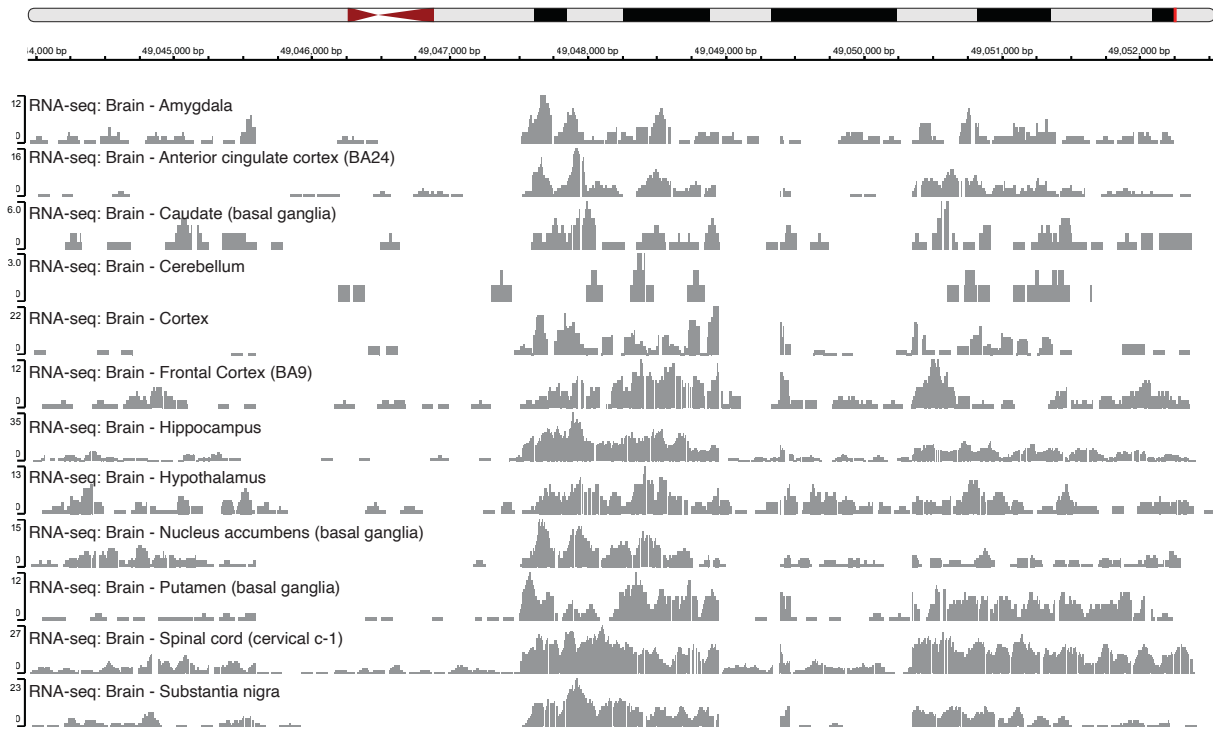

**Figure S12.** *NHIP* was variably expressed between different brain regions. *NHIP* location was queried in various brain regions using the Genotype-Tissue Expression (GTEx) database [24, 39]. Various brain regions show polymorphic expression levels of *NHIP*, with relatively high expression in cortex and low expression in cerebellum.

| Species                                                             | Query start | Query end | Length | Score | E-val     | %ID   | Species      |
|---------------------------------------------------------------------|-------------|-----------|--------|-------|-----------|-------|--------------|
| Human ( <i>Homo sapiens</i> )                                       | 1           | 8609      | 8609   | 17016 | 0         | 100   | Primates     |
| Gorilla ( <i>Gorilla gorilla gorilla</i> )                          | 1           | 8609      | 8672   | 13460 | 0         | 97.16 | Primates     |
| Bonobo ( <i>Pan paniscus</i> )                                      | 1           | 8609      | 8669   | 12011 | 0         | 97.87 | Primates     |
| Chimpanzee ( <i>Pan troglodytes</i> )                               | 1           | 8609      | 8677   | 11964 | 0         | 97.78 | Primates     |
| Orangutan ( <i>Pongo abelii</i> )                                   | 1           | 8609      | 8638   | 7979  | 0         | 94.55 | Primates     |
| Gibbon ( <i>Nomascus leucogenys</i> )                               | 40          | 8609      | 7663   | 7232  | 0         | 94.39 | Primates     |
| Crab-eating macaque ( <i>Macaca fascicularis</i> )                  | 46          | 8609      | 8570   | 6327  | 0         | 90.15 | Primates     |
| Gelada ( <i>Theropithecus gelada</i> )                              | 46          | 8609      | 8609   | 6327  | 0         | 89.98 | Primates     |
| Olive baboon ( <i>Papio anubis</i> )                                | 46          | 8609      | 8563   | 6275  | 0         | 90.02 | Primates     |
| Pig-tailed macaque ( <i>Macaca nemestrina</i> )                     | 46          | 8609      | 8609   | 6260  | 0         | 89.98 | Primates     |
| Macaque ( <i>Macaca mulatta</i> )                                   | 46          | 8077      | 8567   | 6204  | 0         | 89.79 | Primates     |
| Drill ( <i>Mandrillus leucophaeus</i> )                             | 46          | 8077      | 7979   | 6147  | 0         | 89.74 | Primates     |
| Black snub-nosed monkey ( <i>Rhinopithecus bieti</i> )              | 40          | 7499      | 9243   | 6078  | 0         | 89.36 | Primates     |
| Angola colobus ( <i>Colobus angolensis palliatus</i> )              | 40          | 8601      | 8631   | 6060  | 0         | 89.33 | Primates     |
| Sooty mangabey ( <i>Cercocebus atys</i> )                           | 46          | 8609      | 8580   | 6032  | 0         | 89.3  | Primates     |
| Golden snub-nosed monkey ( <i>Rhinopithecus roxellana</i> )         | 40          | 8609      | 9014   | 6024  | 0         | 89.23 | Primates     |
| Vervet-AGM ( <i>Chlorocebus sabaeus</i> )                           | 40          | 8609      | 8601   | 5340  | 0         | 90.66 | Primates     |
| Ugandan red Colobus ( <i>Piliocolobus tephrosceles</i> )            | 980         | 8609      | 7628   | 5178  | 0         | 90.19 | Primates     |
| Ma's night monkey ( <i>Aotus nancymaae</i> )                        | 977         | 7176      | 7351   | 2170  | 0         | 84.83 | Primates     |
| Bolivian squirrel monkey ( <i>Saimiri boliviensis boliviensis</i> ) | 3697        | 7499      | 3576   | 1391  | 0         | 86.14 | Primates     |
| Capuchin ( <i>Cebus capucinus imitator</i> )                        | 46          | 7176      | 6416   | 1077  | 0         | 84.13 | Primates     |
| Marmoset ( <i>Callithrix jacchus</i> )                              | 980         | 1808      | 852    | 557   | 3.00E-155 | 83.45 | Primates     |
| Tarsier ( <i>Carlito syrichta</i> )                                 | 1832        | 6760      | 1596   | 557   | 3.00E-155 | 83.9  | Primates     |
| American bison ( <i>Bison bison bison</i> )                         | 7250        | 7508      | 259    | 251   | 5.00E-63  | 87.26 | Ungulates    |
| Greater bamboo lemur ( <i>Prolemur simus</i> )                      | 7237        | 7476      | 241    | 229   | 1.00E-56  | 87.14 | Primates     |
| American black bear ( <i>Ursus americanus</i> )                     | 1894        | 2072      | 179    | 204   | 8.00E-49  | 89.39 | Carnivores   |
| Polar bear ( <i>Ursus maritimus</i> )                               | 1894        | 2072      | 179    | 204   | 7.00E-49  | 89.39 | Carnivores   |
| Alpaca ( <i>Vicugna pacos</i> )                                     | 7252        | 7464      | 214    | 192   | 3.00E-45  | 86.45 | Ungulates    |
| Panda ( <i>Ailuropoda melanoleuca</i> )                             | 1894        | 2072      | 179    | 188   | 4.00E-44  | 88.27 | Carnivores   |
| Agassiz's desert tortoise ( <i>Gopherus agassizii</i> )             | 7250        | 7491      | 243    | 186   | 2.00E-43  | 84.77 | Birds and Re |
| Coquerel's sifaka ( <i>Propithecus coquereli</i> )                  | 7247        | 7463      | 217    | 184   | 8.00E-43  | 85.71 | Primates     |
| Cat ( <i>Felis catus</i> )                                          | 7252        | 7508      | 265    | 178   | 4.00E-41  | 84.53 | Carnivores   |
| Donkey ( <i>Equus asinus asinus</i> )                               | 1862        | 2058      | 197    | 166   | 1.00E-37  | 85.79 | Ungulates    |
| Horse ( <i>Equus caballus</i> )                                     | 1862        | 2058      | 198    | 164   | 6.00E-37  | 85.86 | Ungulates    |
| Common canary ( <i>Serinus canaria</i> )                            | 7251        | 7414      | 164    | 164   | 3.00E-37  | 87.8  | Birds and Re |
| Goat ( <i>Capra hircus</i> )                                        | 1906        | 2034      | 129    | 160   | 1.00E-35  | 90.7  | Ungulates    |
| Rat ( <i>Rattus norvegicus</i> )                                    | 1899        | 2038      | 140    | 158   | 4.00E-35  | 89.29 | Rats & Mice  |

**Figure S13.** Full length *NHIP* was identified in primates, but not other mammals by blat search. *NHIP* DNA sequence was extracted to blat search compared against vertebrate databases [122].

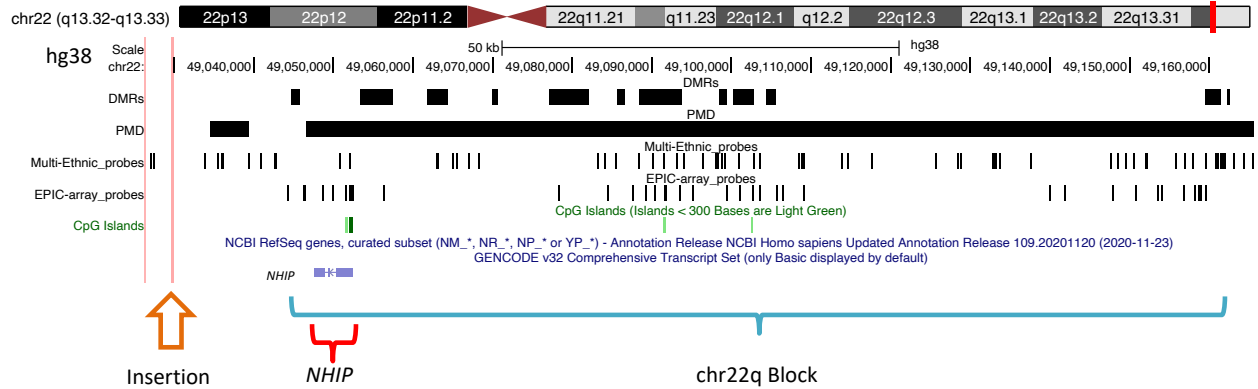

**Figure S14.** 22q13.33 hypomethylated block location relative to PMDs, multi-ethnic SNP probes, and EPIC-array probe locations.

UCSC genome browser (genome assembly: hg38) with the 22q13.33 hypomethylated block (blue), the insertion location (orange), and *NHIP* (red). 12 DMRs located inside the 22q13.33 hypomethylated block are shown in the DMR track. PMD locations are illustrated in the PMD track [15]. SNP-array probe location was extracted from Illumina Infinium multi-ethnic genotyping array. EPIC-array probe location was extracted from Illumina Infinium MethylationEPIC.

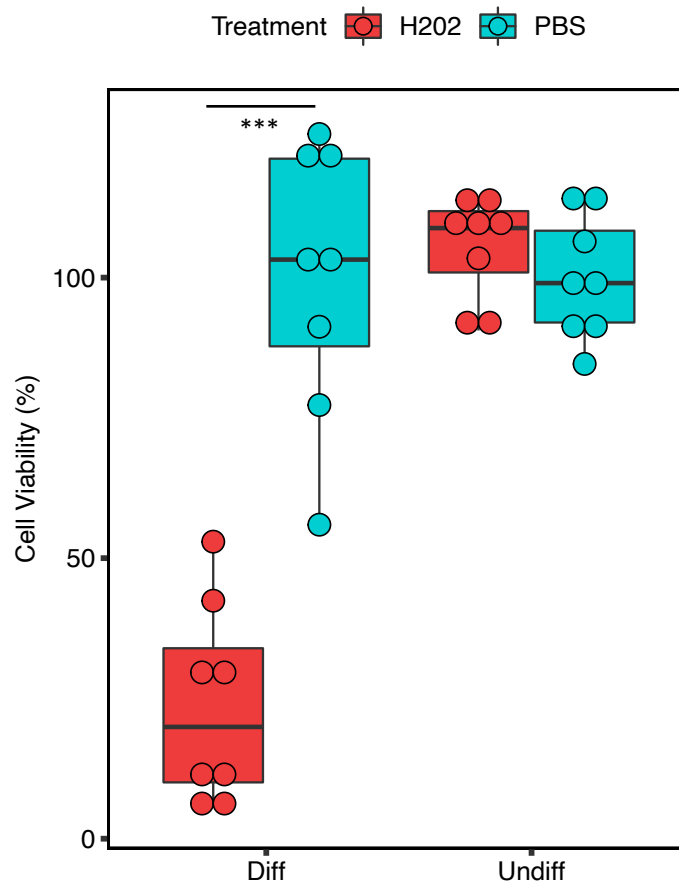

**Figure S15.** Differentiated LUHMES cells are more sensitive to oxidative stress than undifferentiated LUHMES cells.

Cell viabilities were detected by fluorescent intensity of CellTiter luminescent assay. The relative levels in treated cells were generated by comparing with the average of PBS-treated cells for both differentiated and undifferentiated experiments (Mann-Whitney-Wilcoxon,  $p$ -value  $< 0.0001$ , differentiated LUHMES treated with 50nM H<sub>2</sub>O<sub>2</sub> (hypoxia mimetic)  $n = 8$ , differentiated LUHMES treated with vehicle (mock)  $n = 8$ , effect size = -3.58).

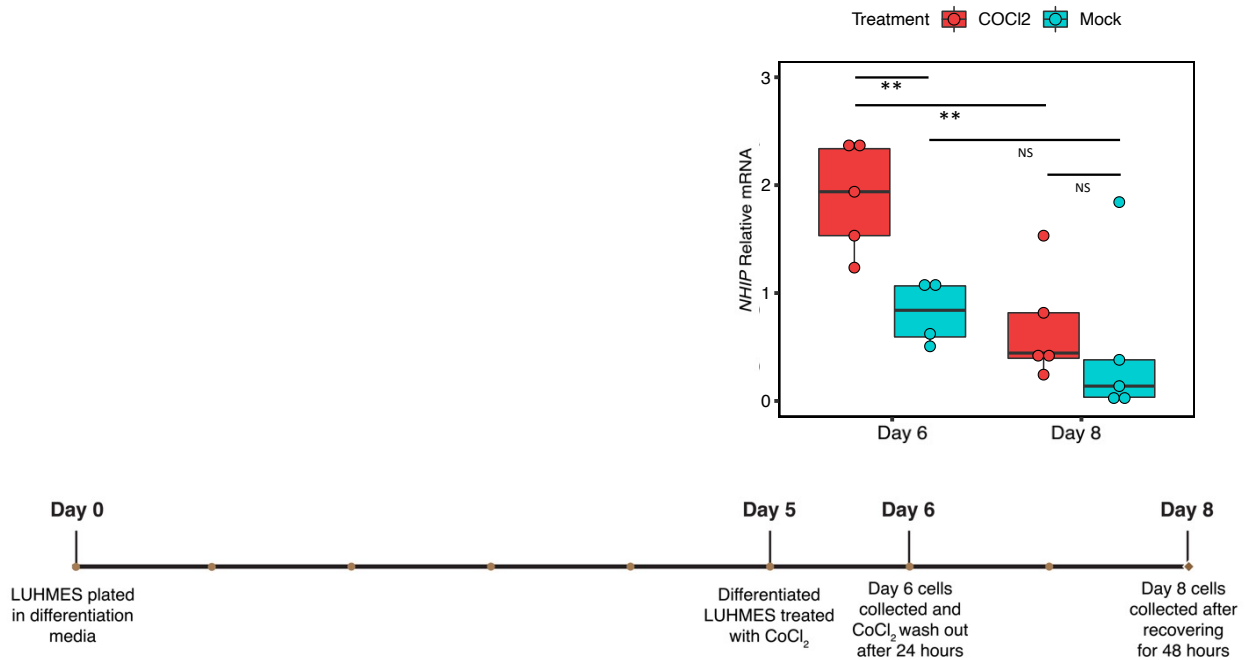

**Figure S16.** *NHIP* transcript levels return to baseline two days following removal of hypoxia mimetic.

LUHMES cells were plated in differentiation media at Day 0. At Day 5, differentiated LUHMES cells were treated with CoCl<sub>2</sub>. After 24 hours of CoCl<sub>2</sub> treatment (Day 6), LUHMES cells treated with CoCl<sub>2</sub> showed significantly increased *NHIP* transcript level compared with LUHMES cells with mock treatment (Mann-Whitney-Wilcoxon,  $p$ -value = 0.009, differentiated LUHMES treated with 100nM CoCl<sub>2</sub> (hypoxia mimetic)  $n$  = 5, differentiated LUHMES treated with vehicle (mock)  $n$  = 4, effect size = 2.58). Cells were washed and replaced with media at Day 6 to allow LUHMES cells to recover. *NHIP* transcript level returned to mock control baseline levels after 48 hours of recovery at Day 8 (treatment  $p$ -value = 0.223). *NHIP* transcript level remained unchanged between Day 6 and Day 8 in the mock treatment cells (Mann-Whitney-Wilcoxon,  $p$ -value = 0.2000), while differentiated LUHMES treated with CoCl<sub>2</sub> at Day 6 had a significantly higher level of *NHIP* compared with 48 hours after CoCl<sub>2</sub> removal on Day 8 (Mann-Whitney-Wilcoxon,  $p$ -value = 0.009).

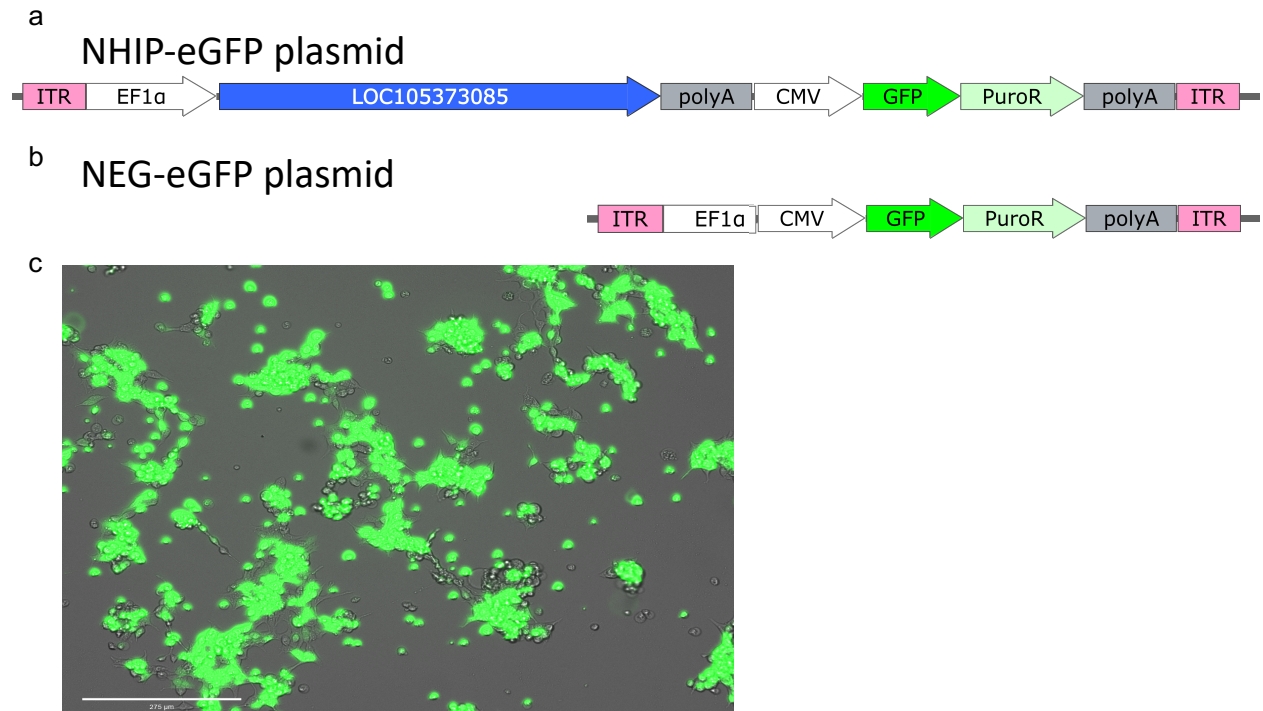

**Figure S17.** HEK293T cells were successfully transfected with overexpressed *NHIP*.

Schematic diagram of vector used for HEK293T cell transfection.

(a) Plasmid with *NHIP*, pb-NHIP-eGFP. EF-1 $\alpha$  as promoter for *NHIP* and CMB as promoter for eGFP fused with puromycin resistant gene.

(b) Negative control plasmid without *NHIP*, pb-NEG-eGFP. Remove *NHIP* from pb-NHIP-eGFP and remove the rest of plasmid structure.

(c) Successful transfection image on HEK293T cell using EVOS microscopy.

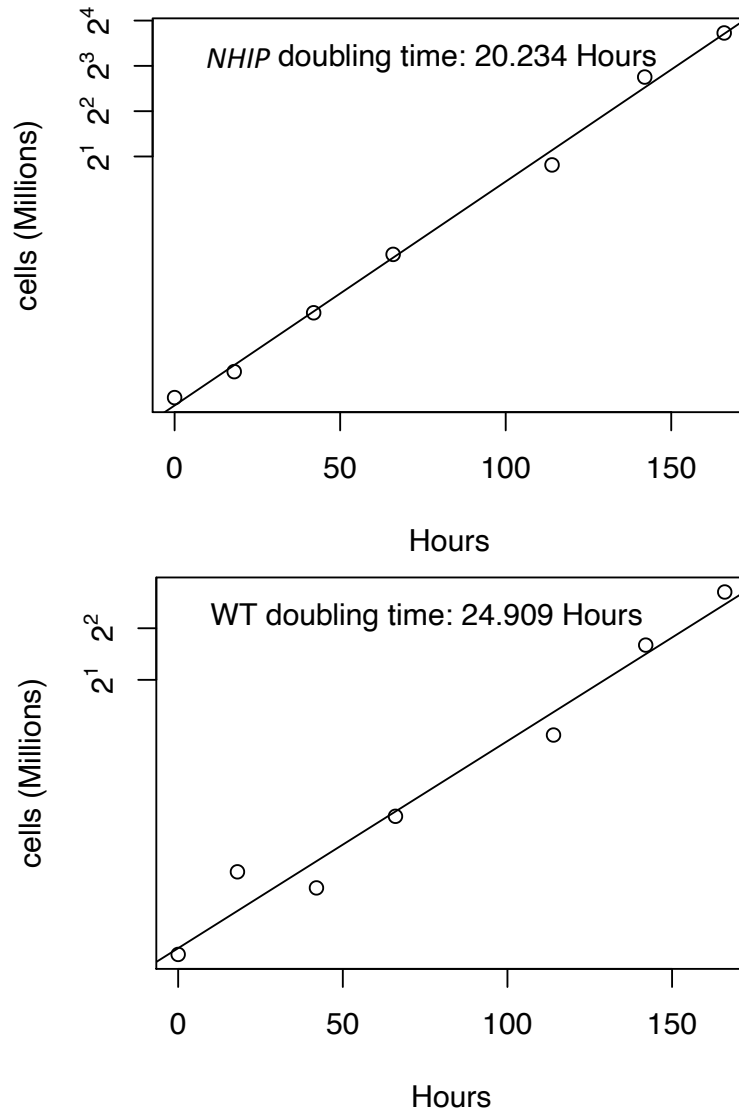

**Figure S18.** HEK293T cells overexpressing *NHIP* exhibited a significantly altered cell cycle. Overexpression of *NHIP* in HEK293T cells resulted in a significantly shortened cell cycle doubling time (overexpression cells doubling time = 20.23 h, wild type cells doubling time = 24.91 h). Doubling times were calculated based on the 1/slope of the regression between log (cells) and time.

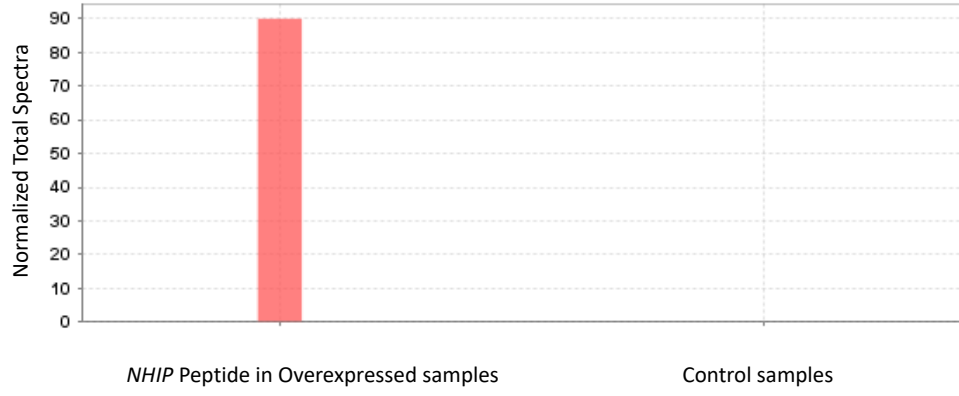

**Figure S19.** Mass spectrometry of NHIP peptide and negative control.



Distribution of the top 578 Blast Hits on 100 subject sequences

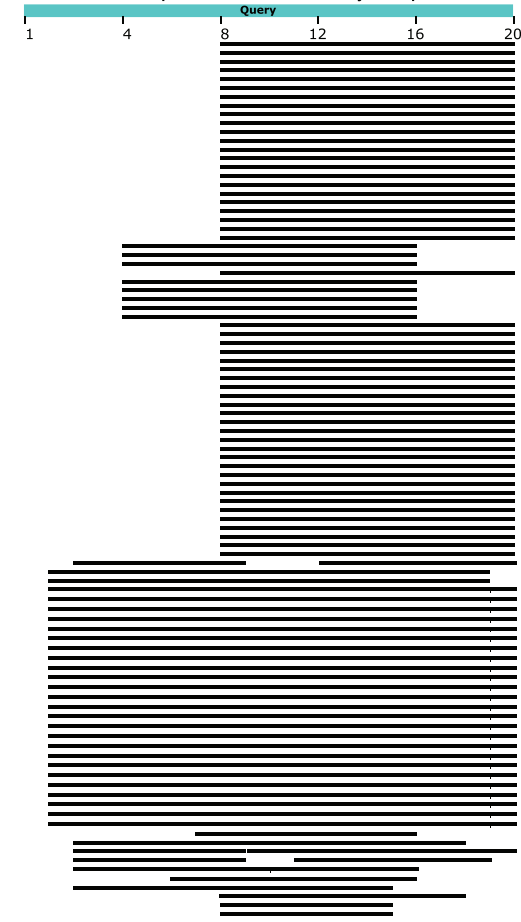

BLAST® » [blastp suite](#) » results for RID-DBJE4WD201R

Your search parameters were adjusted to search for a short input sequence.  
Your search is limited to records that include: Homo sapiens (taxid:9606)

Job Title [Protein Sequence ...](#)  
RID [DBJE4WD201R](#) Search expires on 06-03 11:38 am  
Program Quick BLASTP  
Database nr  
Query ID Icl|Query\_38615  
Description [None ...](#)  
Molecule type amino acid  
Query Length 20

Descriptions

| Description                                                                 | Max Score | Total Score | Query Cover | E value | Per. Ident | Accession                      |
|-----------------------------------------------------------------------------|-----------|-------------|-------------|---------|------------|--------------------------------|
| truncated breast and ovarian cancer susceptibility protein 2 [Homo sapiens] | 26.9      | 26.9        | 60%         | 3.7     | 66.67%     | <a href="#">AYD59793.1</a>     |
| truncated breast and ovarian cancer susceptibility protein 2 [Homo sapiens] | 26.9      | 26.9        | 60%         | 3.8     | 66.67%     | <a href="#">AYD59803.1</a>     |
| DNA repair-associated BRCA2 [Homo sapiens]                                  | 26.9      | 26.9        | 60%         | 3.8     | 66.67%     | <a href="#">OCL11117.1</a>     |
| truncated breast and ovarian cancer susceptibility protein 2 [Homo sapiens] | 26.9      | 26.9        | 60%         | 3.8     | 66.67%     | <a href="#">AYD59769.1</a>     |
| truncated breast and ovarian cancer susceptibility protein 2 [Homo sapiens] | 26.9      | 26.9        | 60%         | 3.8     | 66.67%     | <a href="#">AYD59770.1</a>     |
| truncated breast and ovarian cancer susceptibility protein 2 [Homo sapiens] | 26.9      | 26.9        | 60%         | 3.8     | 66.67%     | <a href="#">AYD59771.1</a>     |
| truncated breast and ovarian cancer susceptibility protein 2 [Homo sapiens] | 26.9      | 26.9        | 60%         | 3.8     | 66.67%     | <a href="#">AYD59772.1</a>     |
| truncated breast and ovarian cancer susceptibility protein 2 [Homo sapiens] | 26.9      | 26.9        | 60%         | 3.8     | 66.67%     | <a href="#">AYD59773.1</a>     |
| truncated breast and ovarian cancer susceptibility protein 2 [Homo sapiens] | 26.9      | 26.9        | 60%         | 3.8     | 66.67%     | <a href="#">OGJ03848.1</a>     |
| truncated breast and ovarian cancer susceptibility protein 2 [Homo sapiens] | 26.9      | 26.9        | 60%         | 3.8     | 66.67%     | <a href="#">AYD59774.1</a>     |
| truncated breast and ovarian cancer susceptibility protein 2 [Homo sapiens] | 26.9      | 26.9        | 60%         | 3.8     | 66.67%     | <a href="#">AYD59775.1</a>     |
| truncated breast and ovarian cancer susceptibility protein 2 [Homo sapiens] | 26.9      | 26.9        | 60%         | 3.8     | 66.67%     | <a href="#">AYD59776.1</a>     |
| truncated breast and ovarian cancer susceptibility protein 2 [Homo sapiens] | 26.9      | 26.9        | 60%         | 3.8     | 66.67%     | <a href="#">OGJ03847.1</a>     |
| truncated breast and ovarian cancer susceptibility protein 2 [Homo sapiens] | 26.9      | 26.9        | 60%         | 3.8     | 66.67%     | <a href="#">AYD59777.1</a>     |
| truncated breast and ovarian cancer susceptibility protein 2 [Homo sapiens] | 26.9      | 26.9        | 60%         | 3.8     | 66.67%     | <a href="#">AYD59778.1</a>     |
| truncated BRCA2 DNA repair-associated protein [Homo sapiens]                | 26.9      | 26.9        | 60%         | 3.8     | 66.67%     | <a href="#">QIM56776.1</a>     |
| truncated breast and ovarian cancer susceptibility protein 2 [Homo sapiens] | 26.9      | 26.9        | 60%         | 3.8     | 66.67%     | <a href="#">AYD59779.1</a>     |
| truncated breast and ovarian cancer susceptibility protein 2 [Homo sapiens] | 26.9      | 26.9        | 60%         | 3.8     | 66.67%     | <a href="#">AYD59780.1</a>     |
| truncated breast and ovarian cancer susceptibility protein 2 [Homo sapiens] | 26.9      | 26.9        | 60%         | 3.8     | 66.67%     | <a href="#">AYD59781.1</a>     |
| truncated breast and ovarian cancer susceptibility protein 2 [Homo sapiens] | 26.9      | 26.9        | 60%         | 3.8     | 66.67%     | <a href="#">AYD59782.1</a>     |
| DNA repair-associated BRCA2 [Homo sapiens]                                  | 26.9      | 26.9        | 60%         | 3.8     | 66.67%     | <a href="#">OCL11116.1</a>     |
| truncated breast and ovarian cancer susceptibility protein 2 [Homo sapiens] | 26.9      | 26.9        | 60%         | 3.8     | 66.67%     | <a href="#">AYD59784.1</a>     |
| truncated breast and ovarian cancer susceptibility protein 2 [Homo sapiens] | 26.9      | 26.9        | 60%         | 3.8     | 66.67%     | <a href="#">OGJ03846.1</a>     |
| unnamed protein product [Homo sapiens]                                      | 26.9      | 26.9        | 60%         | 3.8     | 66.67%     | <a href="#">BAG54725.1</a>     |
| chromodomain-helicase-DNA-binding protein 4 isoform 3 [Homo sapiens]        | 26.9      | 41.1        | 60%         | 3.8     | 66.67%     | <a href="#">NP_001330535.1</a> |
| chromodomain-helicase-DNA-binding protein 4 isoform 2 [Homo sapiens]        | 26.9      | 41.1        | 60%         | 3.8     | 66.67%     | <a href="#">NP_001284462.1</a> |
| truncated breast and ovarian cancer susceptibility protein 2 [Homo sapiens] | 26.9      | 26.9        | 60%         | 3.8     | 66.67%     | <a href="#">AYD59785.1</a>     |
| chromodomain helicase DNA binding protein 4, isoform CRA_c [Homo sapiens]   | 26.9      | 41.1        | 60%         | 3.8     | 66.67%     | <a href="#">EAW88779.1</a>     |
| chromodomain helicase DNA binding protein 4, isoform CRA_a [Homo sapiens]   | 26.9      | 41.1        | 60%         | 3.8     | 66.67%     | <a href="#">EAW88777.1</a>     |
| chromodomain helicase DNA binding protein 4, isoform CRA_b [Homo sapiens]   | 26.9      | 41.1        | 60%         | 3.8     | 66.67%     | <a href="#">EAW88778.1</a>     |
| chromodomain-helicase-DNA-binding protein 4 isoform 1 [Homo sapiens]        | 26.9      | 41.1        | 60%         | 3.8     | 66.67%     | <a href="#">NP_001284.2</a>    |
| CHD4 protein [Homo sapiens]                                                 | 26.9      | 41.1        | 60%         | 3.8     | 66.67%     | <a href="#">AAH38996.1</a>     |

Figure S20. NHIP peptide in blat search [122] with hits on BRCA2 and CHD4.

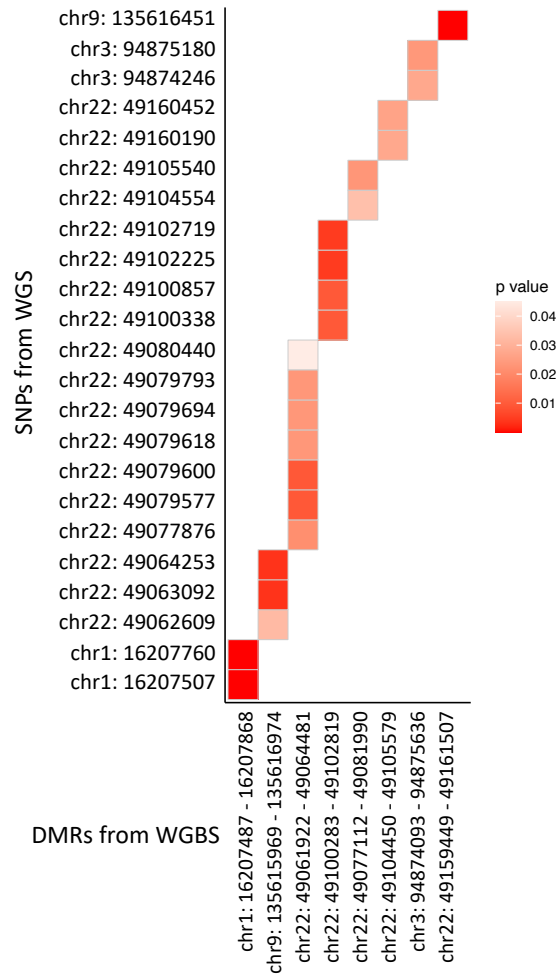

**Figure S21.** Percent methylation at eight DMRs was significantly associated with *in cis* SNPs. Percent methylation for each DMR was extracted from WGBS as average smooth methylation of the DMR region. WGS data was used to extract the *in cis* SNPs located within the DMRs. Significance tests were done between the *in cis* SNPs and DMRs using linear regression, with  $p$ -value < 0.05 shown (discovery group, ASD n = 41, TD n = 37).

| Diagnosis \ Insertion | Yes | No |
|-----------------------|-----|----|
|                       | ASD | 20 |
| TD                    | 9   | 27 |

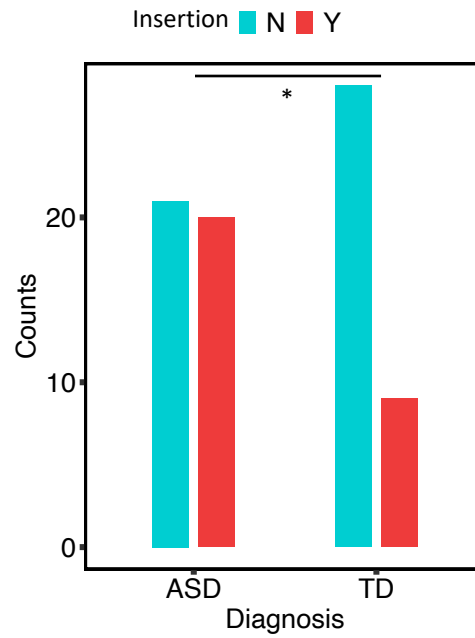

**Figure S22.** Count matrix of the 1.7 kb insertion genotypes, with a significantly higher frequency in ASD compared to TD (discovery group, ASD n = 41, TD n = 37) (chi-square test,  $p$ -value = 0.045).

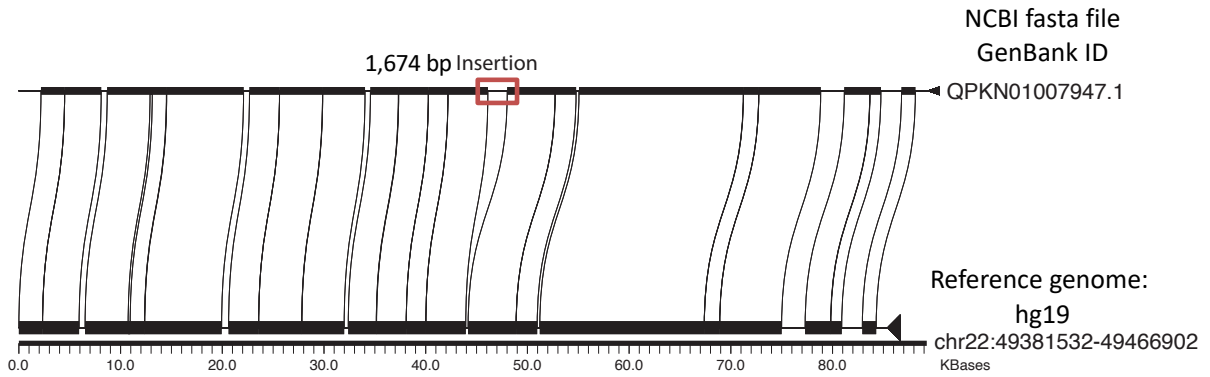

**Figure S23.** Insertion was characterized with PacBio long-read sequencing. QPKN01007947.1 contig [43] mapped to reference genome chr22: 49,381,532 – 49,466,902 with Miropeats [123] used for visualization. The orange box shows the clear insertion of 1,674 bp in length, comparing the QPKN01007947.1 contig with the reference genome.

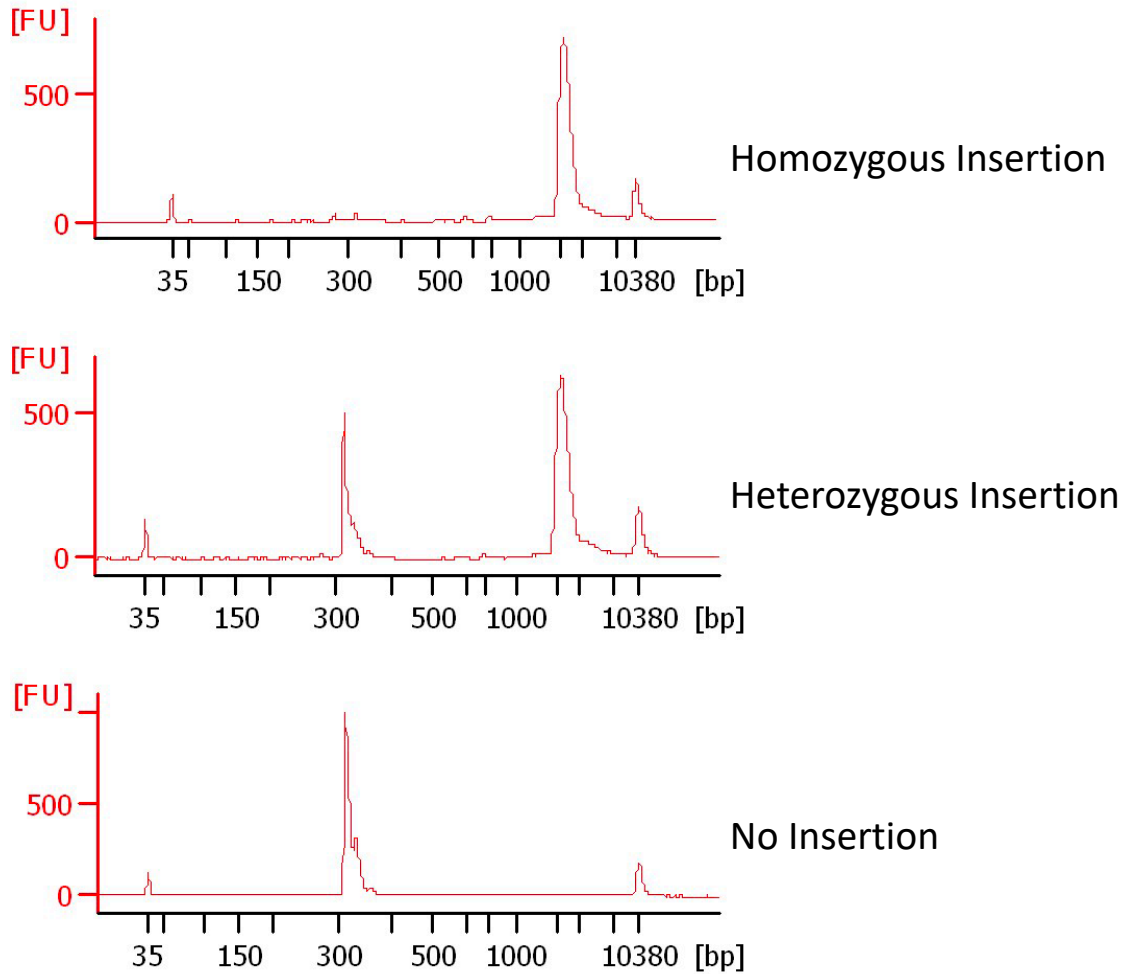

**Figure S24.** Insertion profiles were validated using PCR genotyping on the same sample. Genotyping primers were designed flanking both sides of the insertion to discriminate the alleles based on size following PCR. Agarose gel electrophoresis and bioanalyzer shown the same result (discovery group, ASD n = 41, TD n = 37).



# Structural variant: INS\_22\_115103

Dataset gnomAD SVs v2.1

Filter Pass

Allele Count 14350  
 Allele Number 20614  
 Allele Frequency 0.6961  
 Quality score 999  
 Position 22:49425456  
 Size 1,314 bp  
 Class insertion (ME:SVA) ?  
 Evidence Split reads  
 Algorithms MELT

## Consequences

This variant has consequences in 0 genes.

## External Resources

- UCSC

## Feedback

[Report an issue with this variant](#)

## Genotype Quality

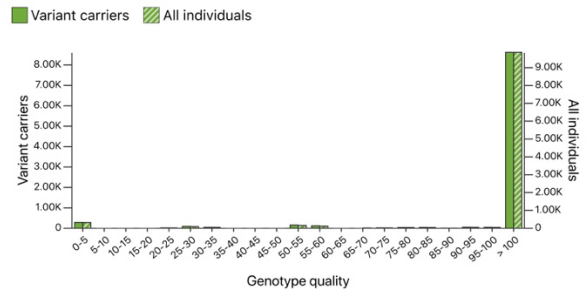

Compare to all individuals

## Age Distribution

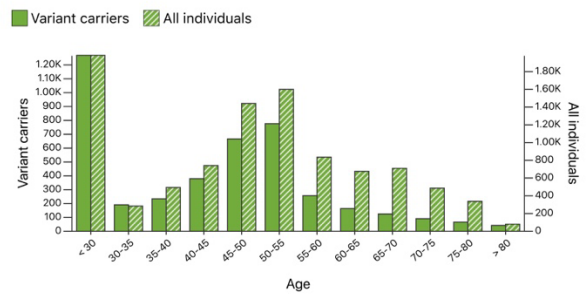

Include heterozygous variant carriers

Include homozygous variant carriers

Compare to all individuals

## Population Frequencies

| Population               | Allele Count | Allele Number | Number of Homozygotes | Allele Frequency |
|--------------------------|--------------|---------------|-----------------------|------------------|
| Latino                   | 1178         | 1470          | 463                   | 0.8014           |
| European                 | 5437         | 7452          | 1908                  | 0.7296           |
| African/African-American | 6121         | 9086          | 1988                  | 0.6737           |
| Other                    | 125          | 190           | 40                    | 0.6579           |
| East Asian               | 1489         | 2416          | 404                   | 0.6163           |
| XX                       | 7131         | 10132         | 2422                  | 0.7038           |
| XY                       | 7189         | 10444         | 2369                  | 0.6883           |
| <b>Total</b>             | <b>14350</b> | <b>20614</b>  | <b>4803</b>           | <b>0.6961</b>    |

**Figure S26.** The insertion was also identified in the gnomAD database. gnomAD dataset [45,46] snapshot of the insertion named as INS\_22\_115103, classified as insertion structural variant with SVA element.

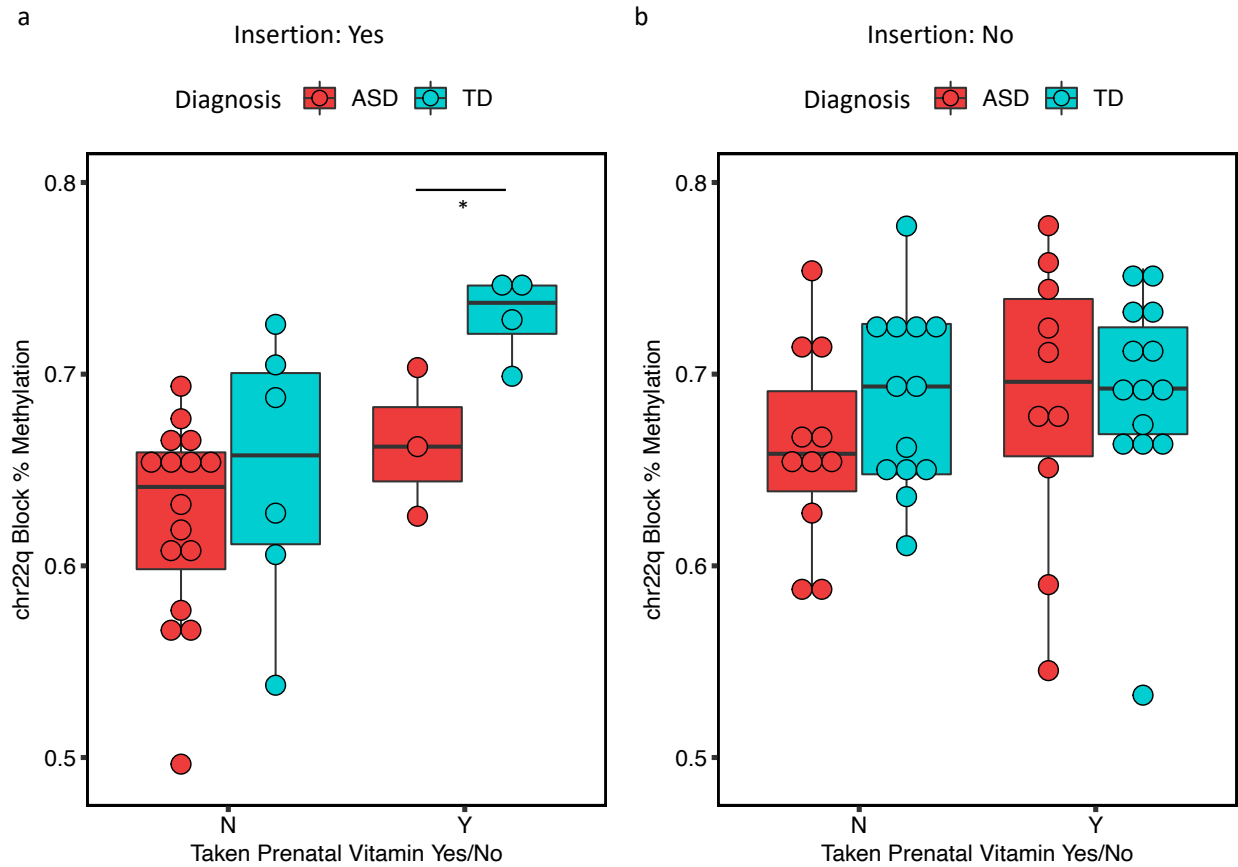

**Figure S27.** When separated by insertion genotype, methylation levels at 22q13.33 were most different between TD and ASD in offspring homozygous for the insertion whose mothers took a prenatal vitamin in month 1 of pregnancy.

In other words, for individuals with the genetic risk of the insertion, taking prenatal vitamins at P1 significantly altered 22q13.33 block methylation, in the protective direction (Mann-Whitney-Wilcoxon,  $p$ -value = 0.046, ASD  $n$  = 3, TD  $n$  = 4, effect size = -2.09), a difference which was not significant in those with the insertion whose mothers did not take a prenatal vitamin ( $p$ -value = 0.407).



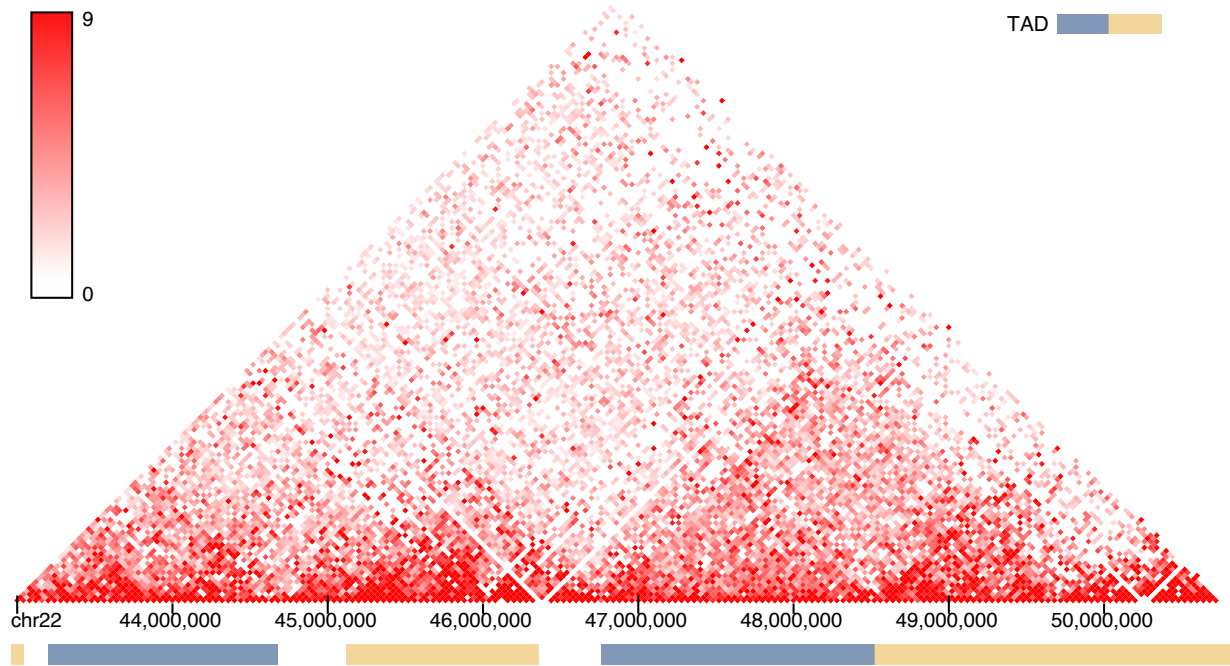

**Figure S28.** Topologically associated domain (TAD) from hippocampus on 22q13.31 – 22q13.33 regions that extends to the telomere, assembly in hg38 with resolution at 40 kb [53].

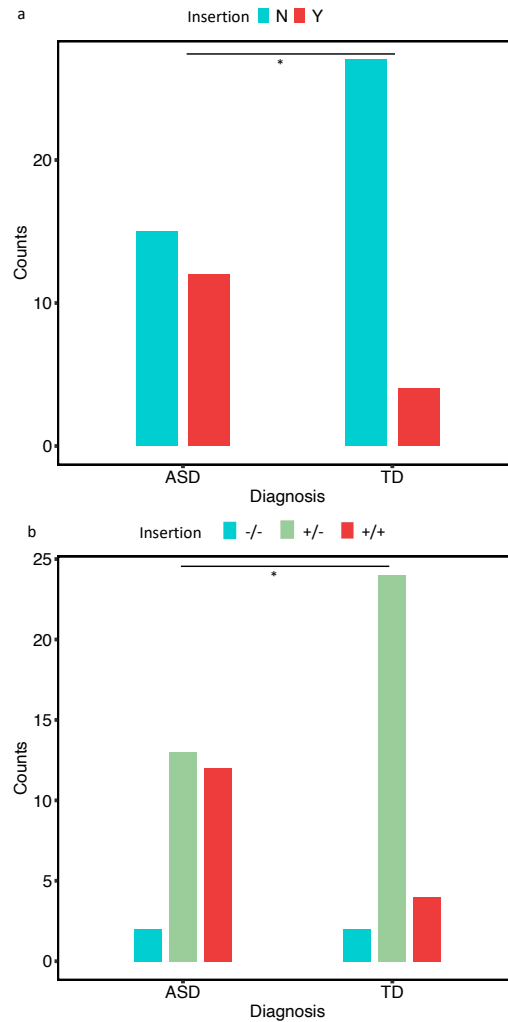

**Figure S29.** The insertion had significantly higher frequency in ASD compared with TD samples in brain.

**(a)** Count matrix was based on the Y/N insertion genotypes in brain, showing a higher frequency of individuals with the insertion in ASD compared to TD (ASD  $n = 27$ , TD  $n = 30$ ) (chi-square test,  $p$ -value = 0.023).

**(b)** Count matrix was based on -/-, +/-, +/+ insertion genotypes in brain, showing a higher frequency of individuals with homozygosity for the insertion (+/+) in ASD compared to TD (ASD  $n = 27$ , TD  $n = 30$ ) (chi-square test,  $p$ -value = 0.028).

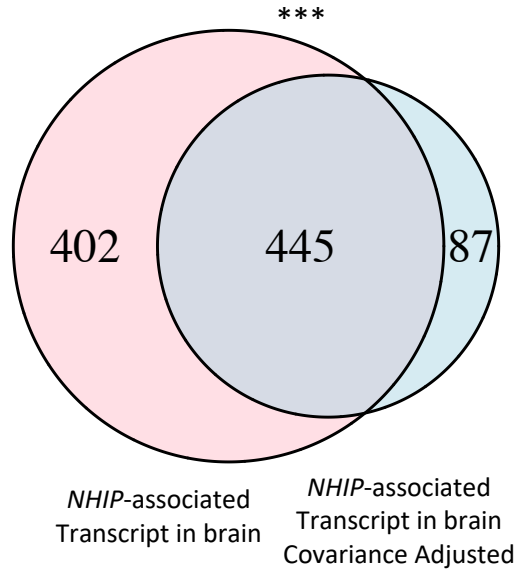

**Figure S30.** *NHIP*-associated genes in brain adjusted for covariates (age, sex, region, PMI, race, ethnicity) significantly overlapped with *NHIP*-associated genes compared to all expressed genes (Fisher's exact test,  $p$ -value < 2.2E-16, OR = 248.454).

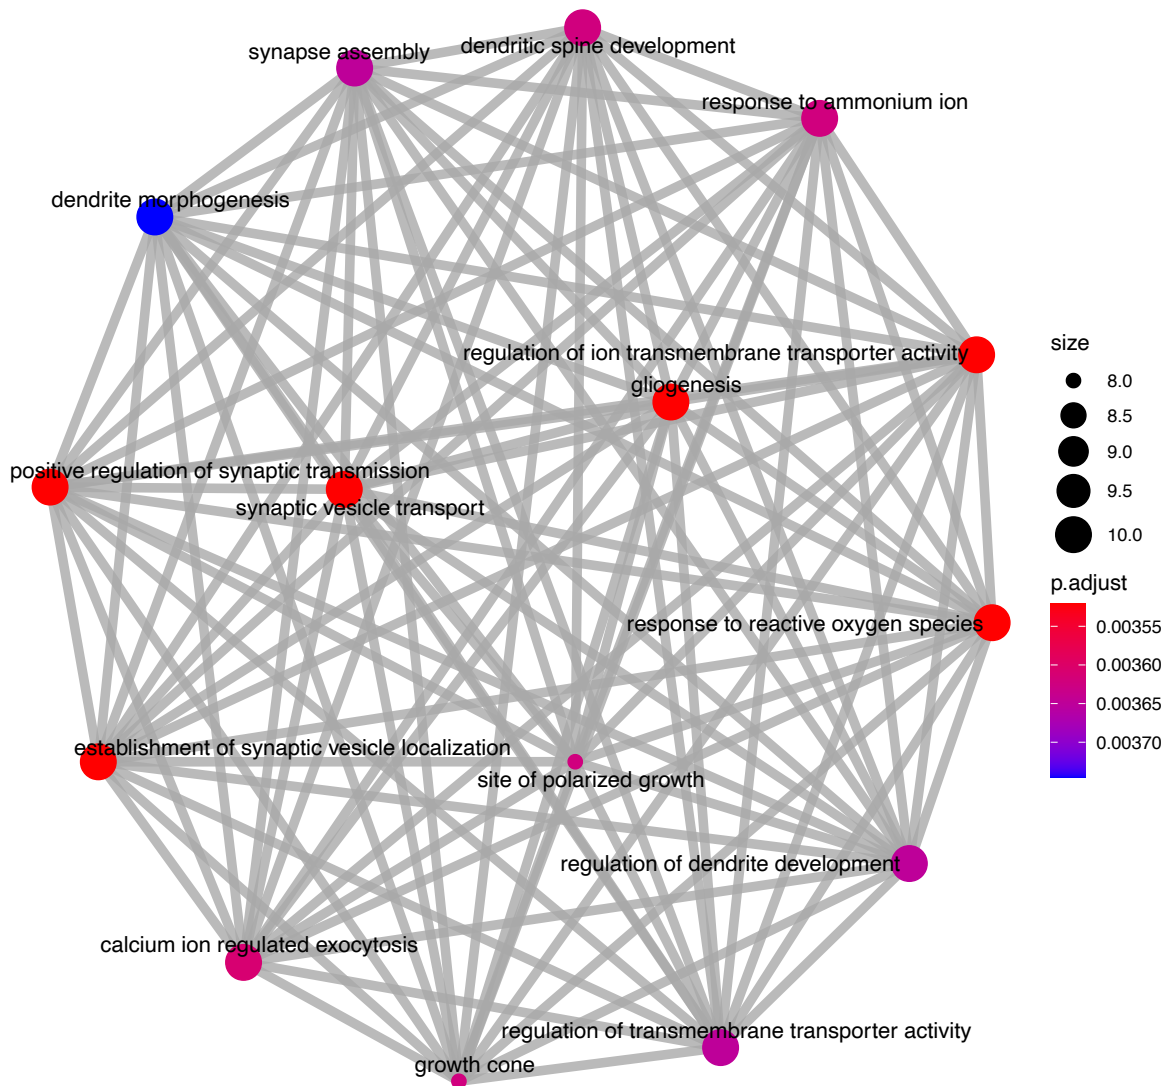

**Figure S31.** Genes significantly associated with *NHIP* levels were enriched for neuronal functions.

GO terms analysis was based on the genes showing significant *NHIP* association in brain after adjustment for potential covariates. The enrichment map organized significantly enriched terms into a network with edges connecting overlapping gene sets. Clustered gene sets were identified as functional modules with mutually overlapping genes.

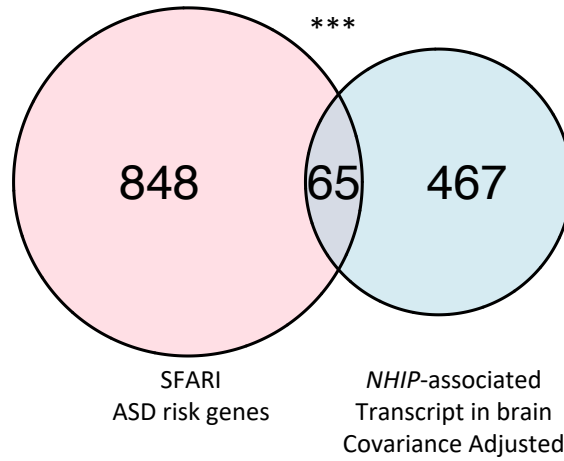

**Figure S32.** *NHIP*-associated genes in brain (adjusted for potential covariates) show a significant overlap with SFARI ASD risk genes compared to all expressed genes (Fisher's exact test,  $p$ -value < 0.001).

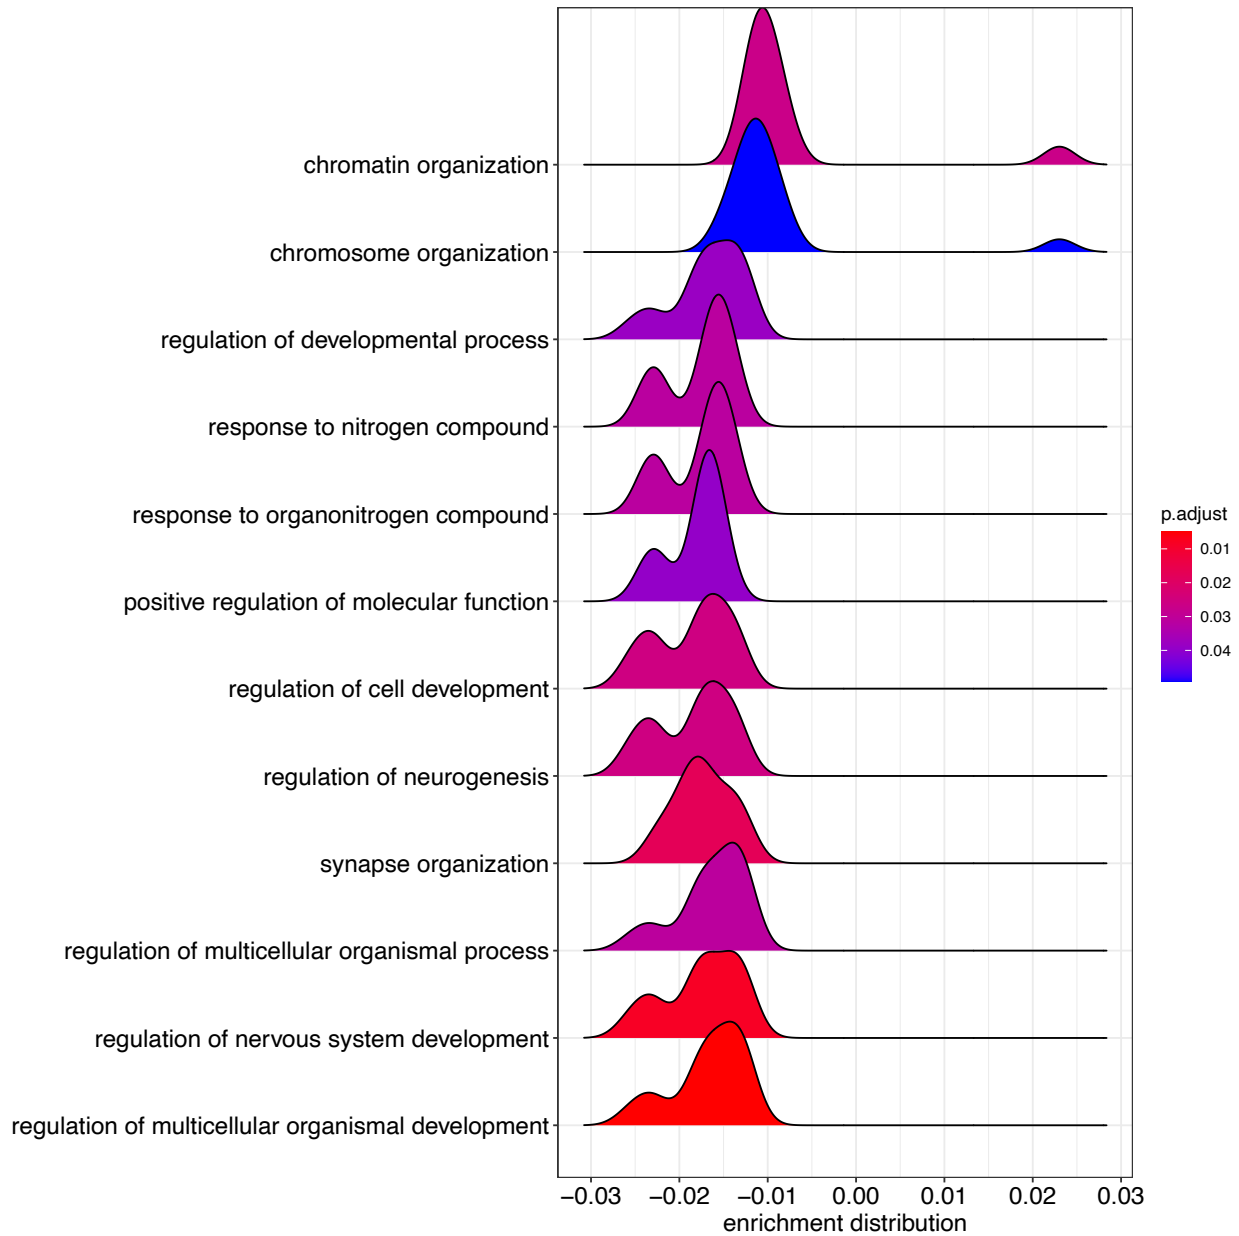

**Figure S33.** Genes in common between brain DGE and SFARI ASD genes show enrichment for chromatin, synapse, and nervous system development. GO term analysis was based on the 65 genes in common between *NHIP* association in brain and SFARI ASD genes. The ridgeline plot was generated using the frequency of fold change values per gene within each enrichment GO term set.

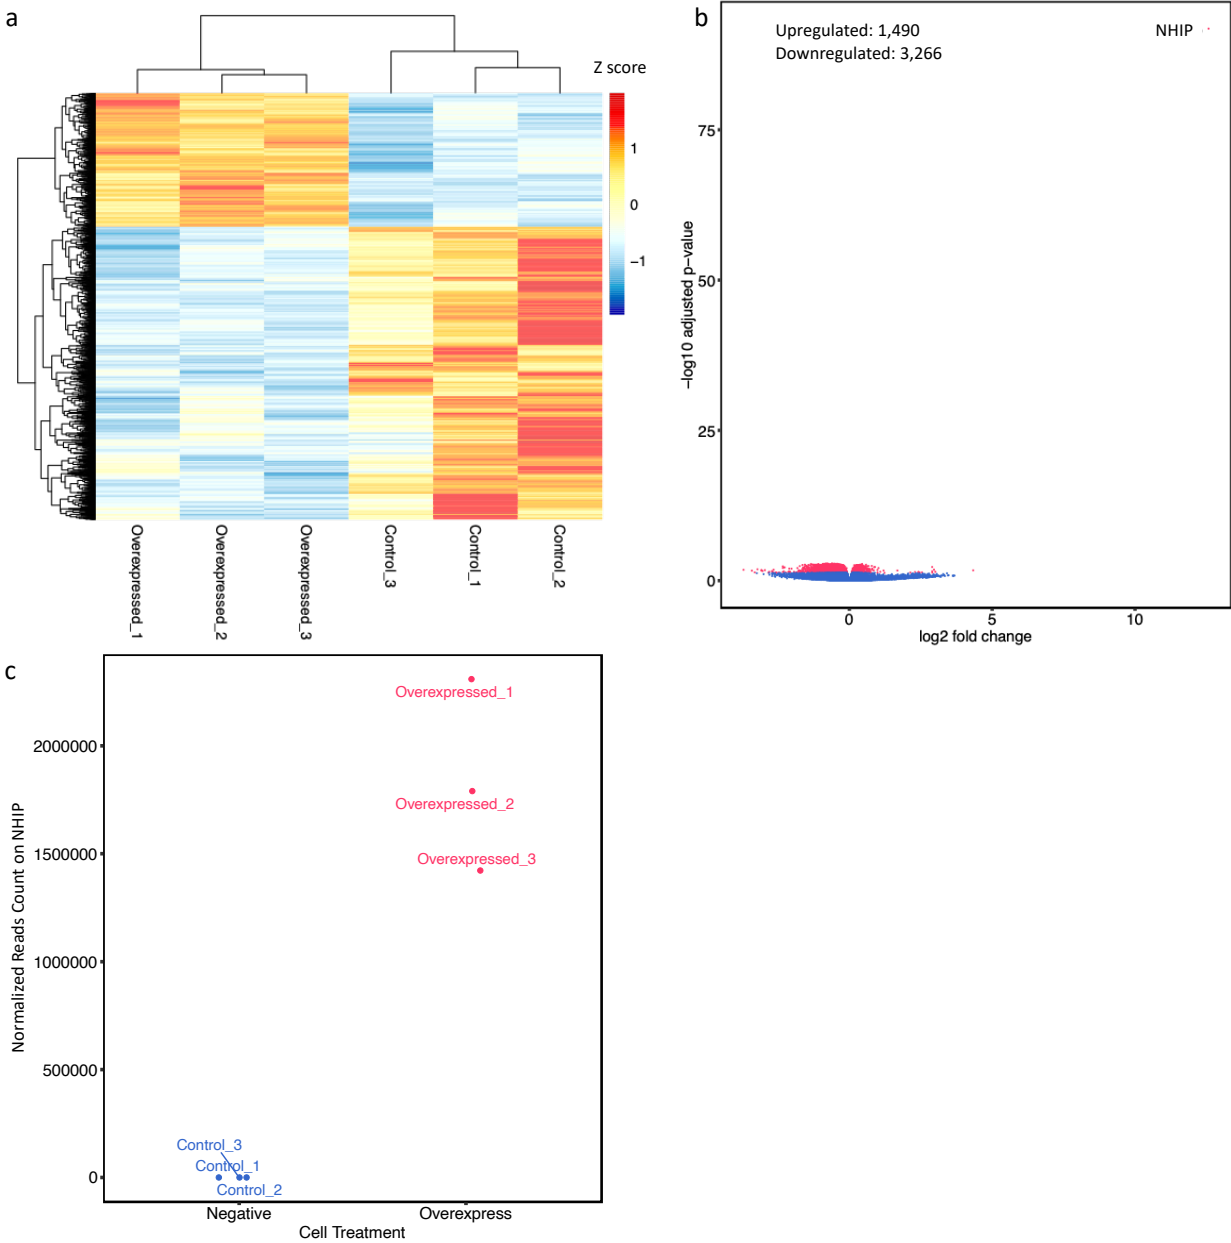

**Figure S34.** RNA-seq from overexpression of *NHIP* versus negative control cells, identifying 4,756 differential expressed genes (FDR 0.05 corrected).  
**(a)** Heatmap and hierarchical clustering of 3 overexpressed *NHIP* and 3 negative control with clear separation by condition.  
**(b)** Volcano plot showing 4,756 DGEs including 1,490 upregulated and 3,266 downregulated genes.  
**(c)** Graph to illustrate the difference in *NHIP* transcript levels between overexpressed and negative control cells.

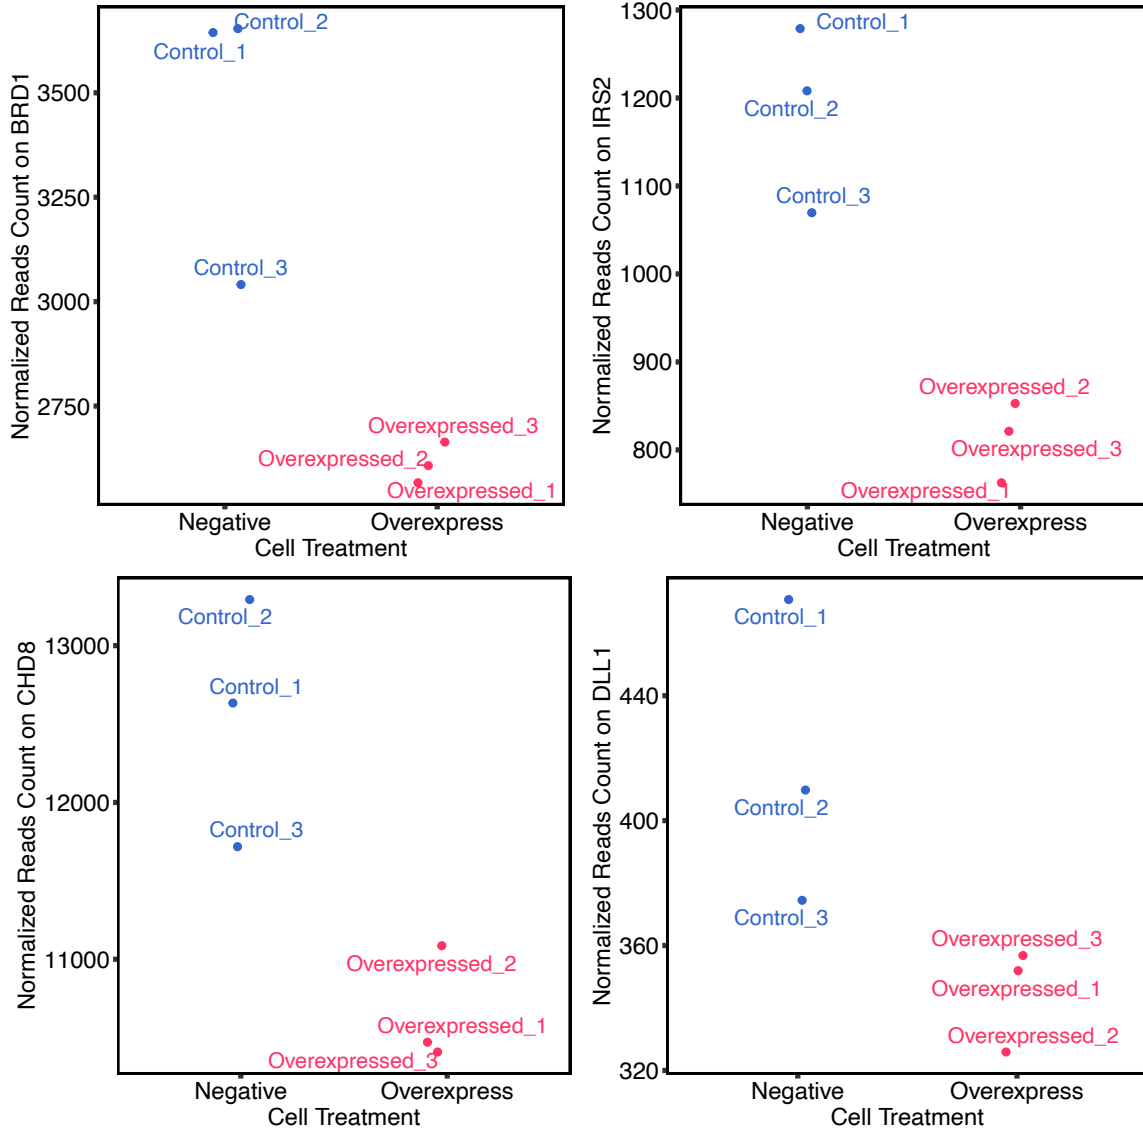

**Figure S35.** Several genes were downregulated with *NHIP* overexpression in HEK293T cells. Normalized read counts from RNA-seq are plotted on the y-axis, while x-axis shows cell treatment. *BRD1* (adjusted  $p$ -value: 0.004), *IRS2* (adjusted  $p$ -value: 0.003), *CHD8* (adjusted  $p$ -value: 0.003), and *DLL1* (adjusted  $p$ -value: 0.048) were significantly downregulated in overexpression *NHIP* cells. Additional File 22: Table S21 contains additional details of RNA-seq statistical analyses.



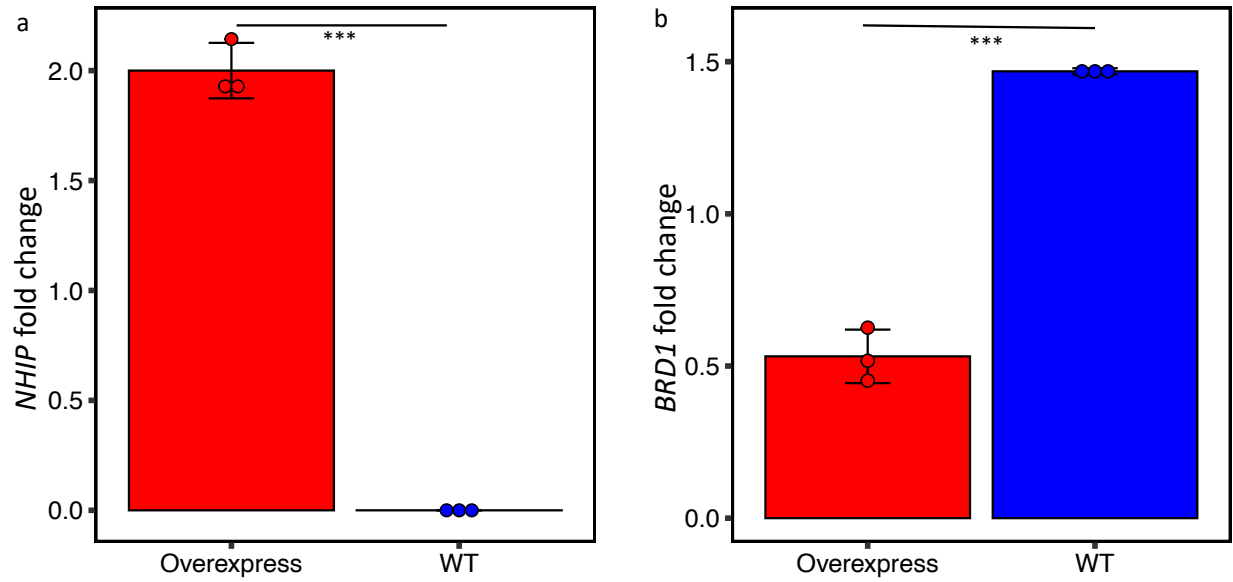

**Figure S36.** *NHIP* overexpression related changes to *BRD1* were validated using RT-qPCR. To validate the results from RNA-seq, RT-qPCR was performed on *NHIP* and *BRD1*. *NHIP* was significantly upregulated in the *NHIP* overexpressing cell line (Mann-Whitney-Wilcoxon,  $p$ -value = 0.001). *BRD1* was significantly downregulated in the overexpressing cell line (Mann-Whitney-Wilcoxon,  $p$ -value = 0.002).

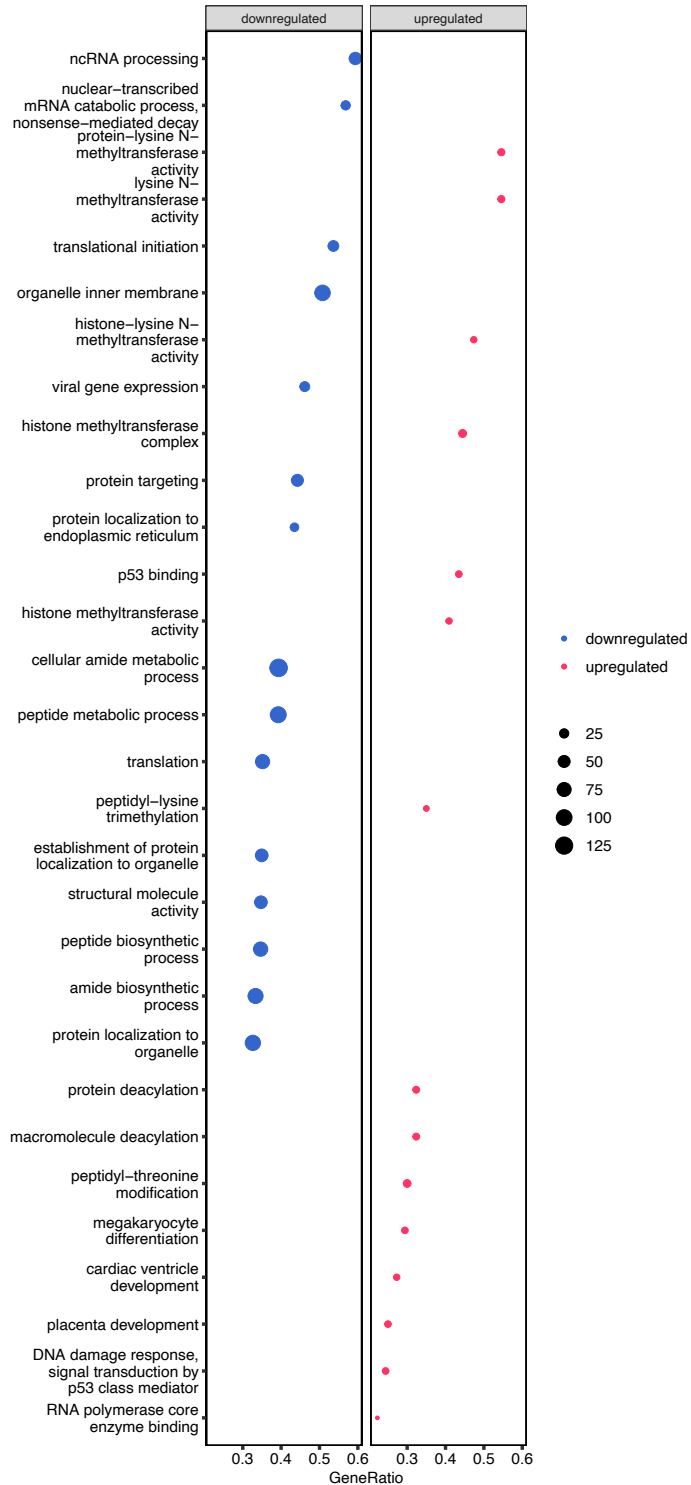

**Figure S37.** Overexpression of *NHIP* in HEK293T cells led to transcriptional changes in genes with functions in histone methylation and cell cycle.

GO analysis was based on the 4,756 DGE comparing *NHIP* overexpression and negative control cells with significant enrichment colored in red and blue to represent upregulated and downregulated GO terms, respectively (FDR adjusted  $p$ -value < 0.05).

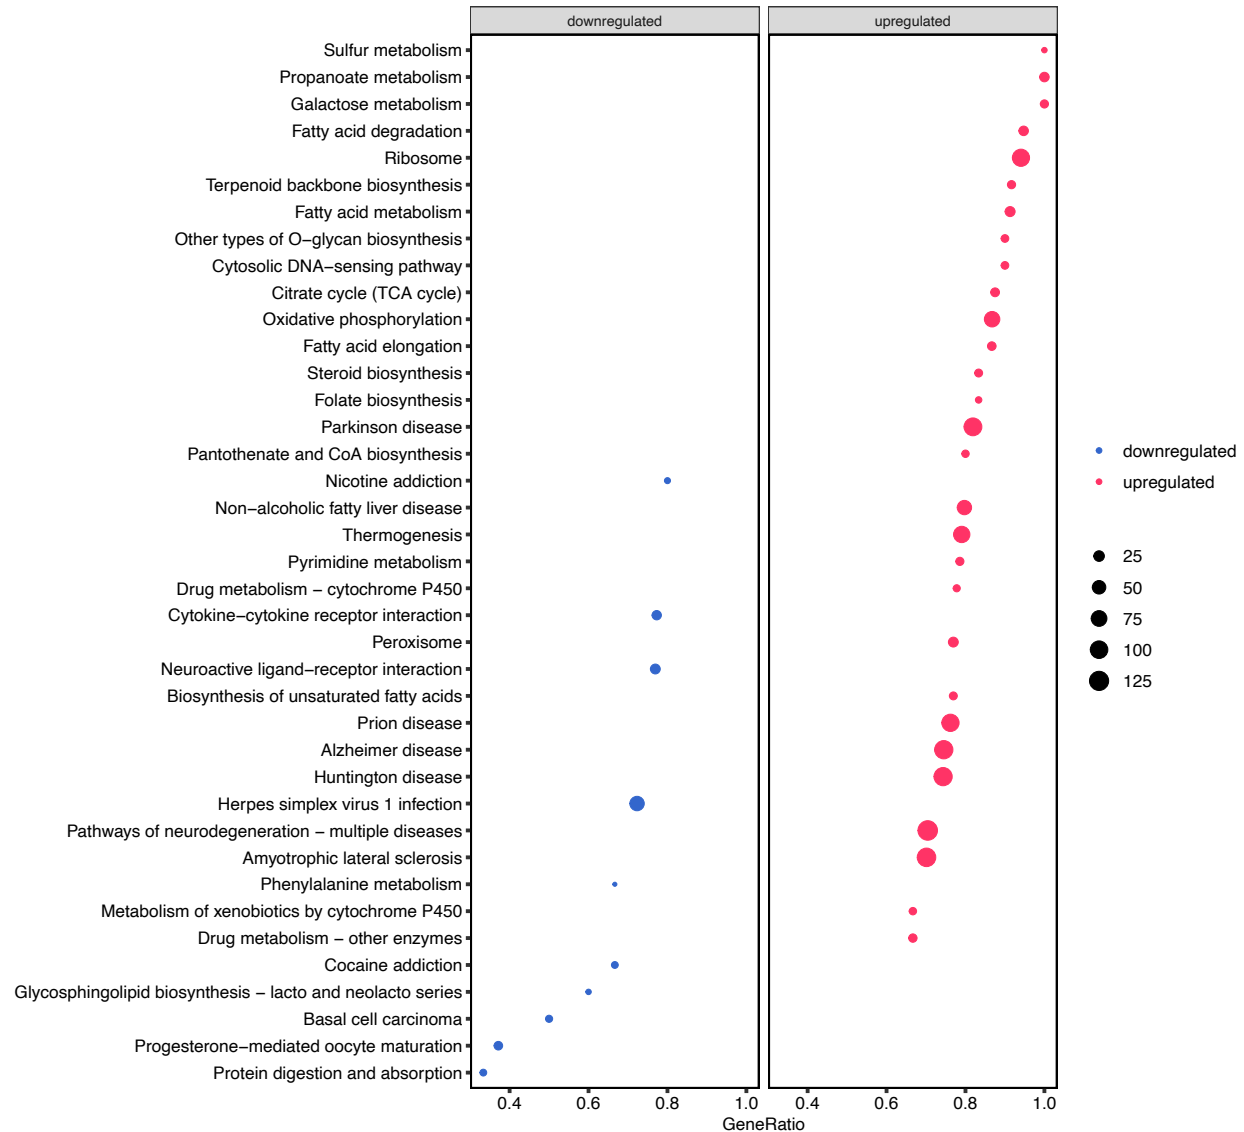

**Figure S38.** Genes significantly associated with overexpression of *NHIP* in HEK293T cells were enriched for neurological diseases.

Enrichment analyses of DGE in cells were also compared to Kyoto Encyclopedia of Genes and Genomes (KEGG) [55] gene sets using the clusterProfiler package [131]. Several terms related with the neurological diseases Parkinson’s disease, Alzheimer’s disease, and Huntington’s disease were upregulated after overexpressing *NHIP* in HEK293T cells. Metabolism terms, including fatty acid and drug metabolism, were also upregulated with *NHIP* overexpression. GO analysis was based on the 4,756 DGE from *NHIP* overexpression compared to negative control cells, with significant enrichment colored in red for upregulated or blue for downregulated GO terms (FDR adjusted  $p$ -value < 0.05).

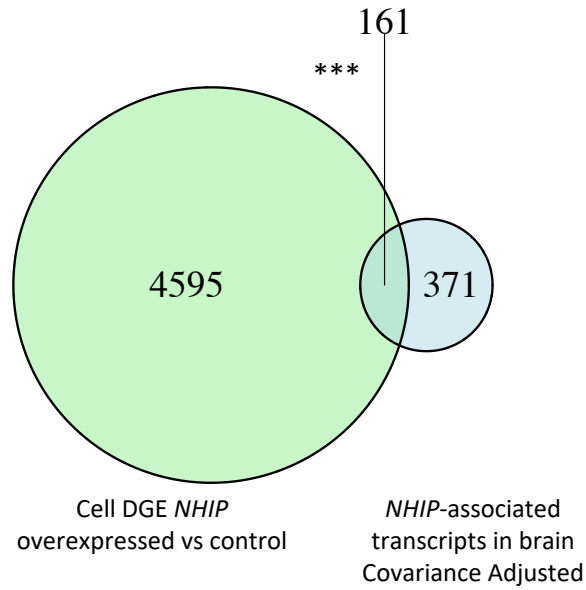

**Figure S39.** Genes differentially expressed in *NHIP* overexpressing cells significantly overlapped with *NHIP* associated genes identified in brain compared to all expressed genes (Fisher's exact test,  $p$ -value < 0.001), using brain RNA-seq data adjusted for sex, age, brain region, and postmortem interval.

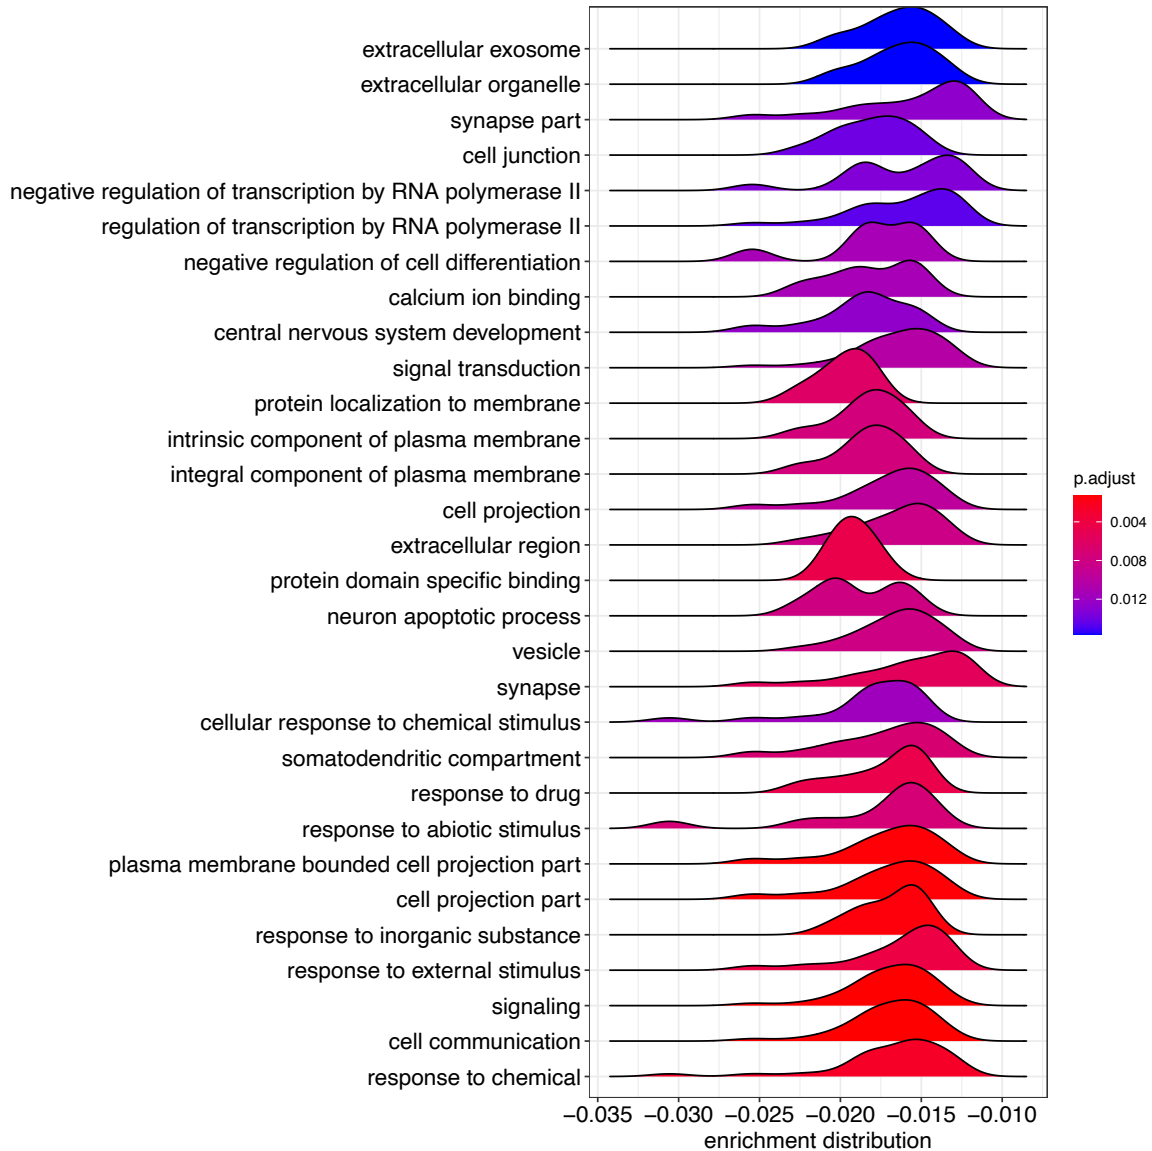

**Figure S40.** Genes in common between *NHIP* DGE in cell and *NHIP* associated in brain (adjusted) were significantly enriched for neuronal functions.

GO term analysis of the overlapping 161 genes showed enrichment for neuronal functions, including dendrite, nervous system development, and regulation of neurogenesis. The ridgeline plot was generated using the frequency of fold change values per gene within each enrichment GO term set.

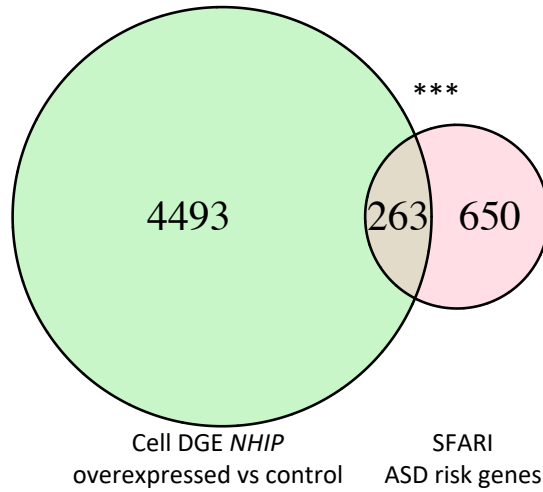

**Figure S41.** Genes differentially expressed in *NHIP* overexpressing cells significantly overlapped with SFARI ASD genes compared to all expressed genes (Fisher's exact test,  $p$ -value < 0.001).

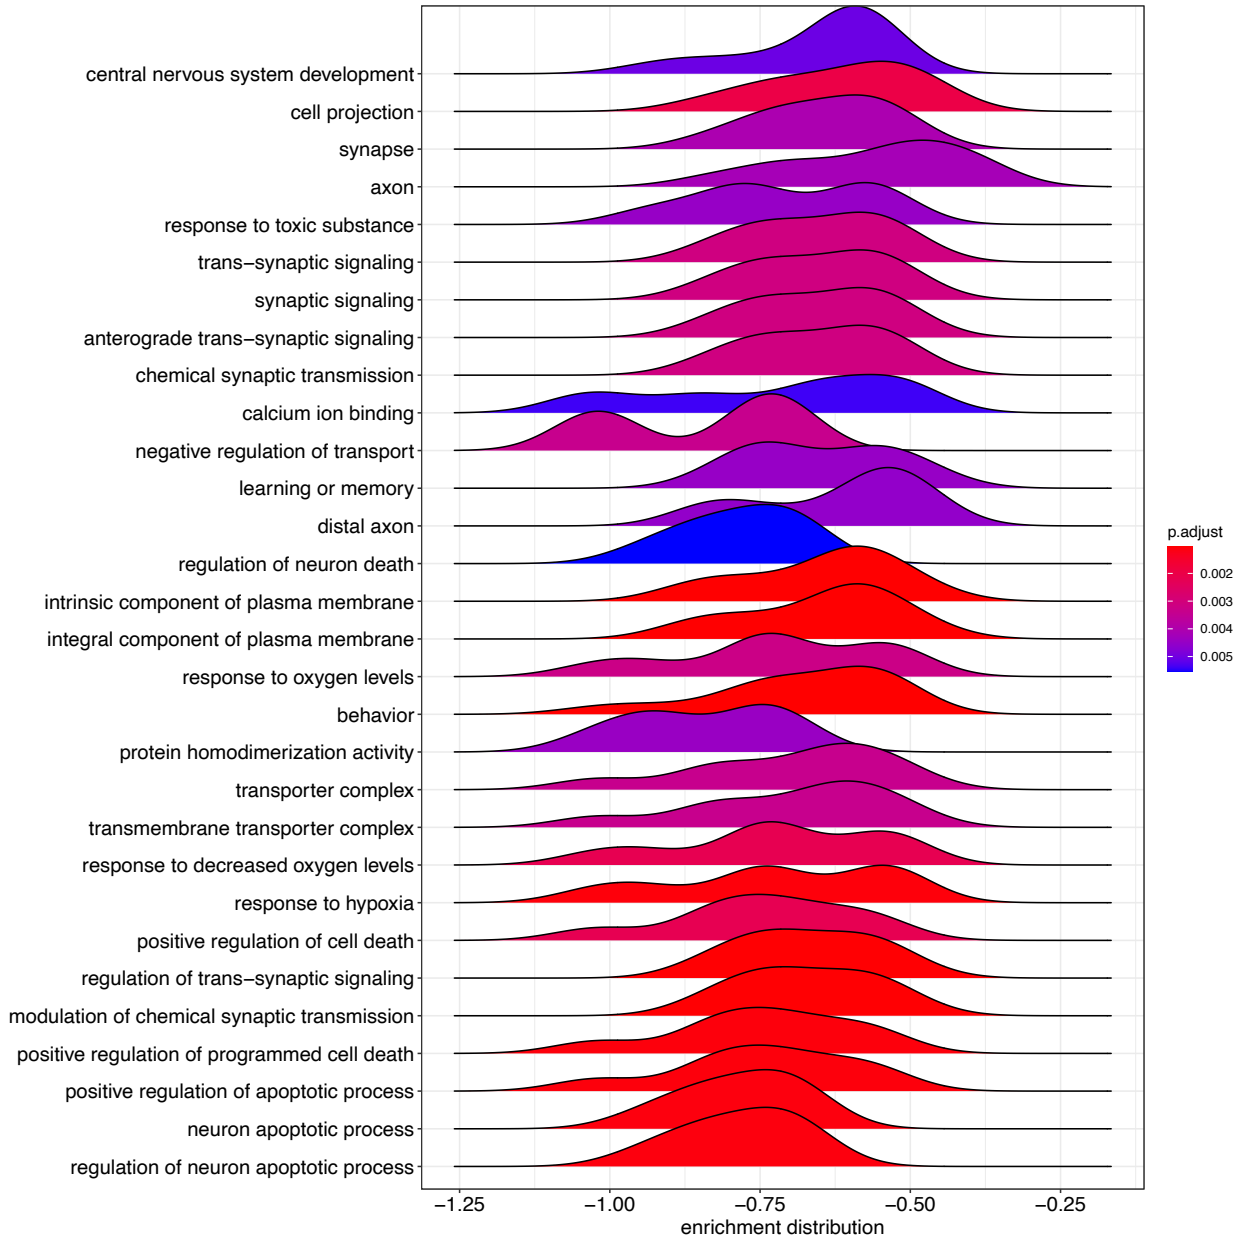

**Figure S42.** Genes in common between cell line NHIP overexpression DGE and SFARI ASD genes are enriched for neuronal functions and response to oxygen levels. GO term analysis was based on the 263 genes in common between significant DGE in the HEK293T overexpression *NHIP* and SFARI ASD genes. The ridgeline plot was generated using the frequency of the fold change values per gene within each enriched GO term.

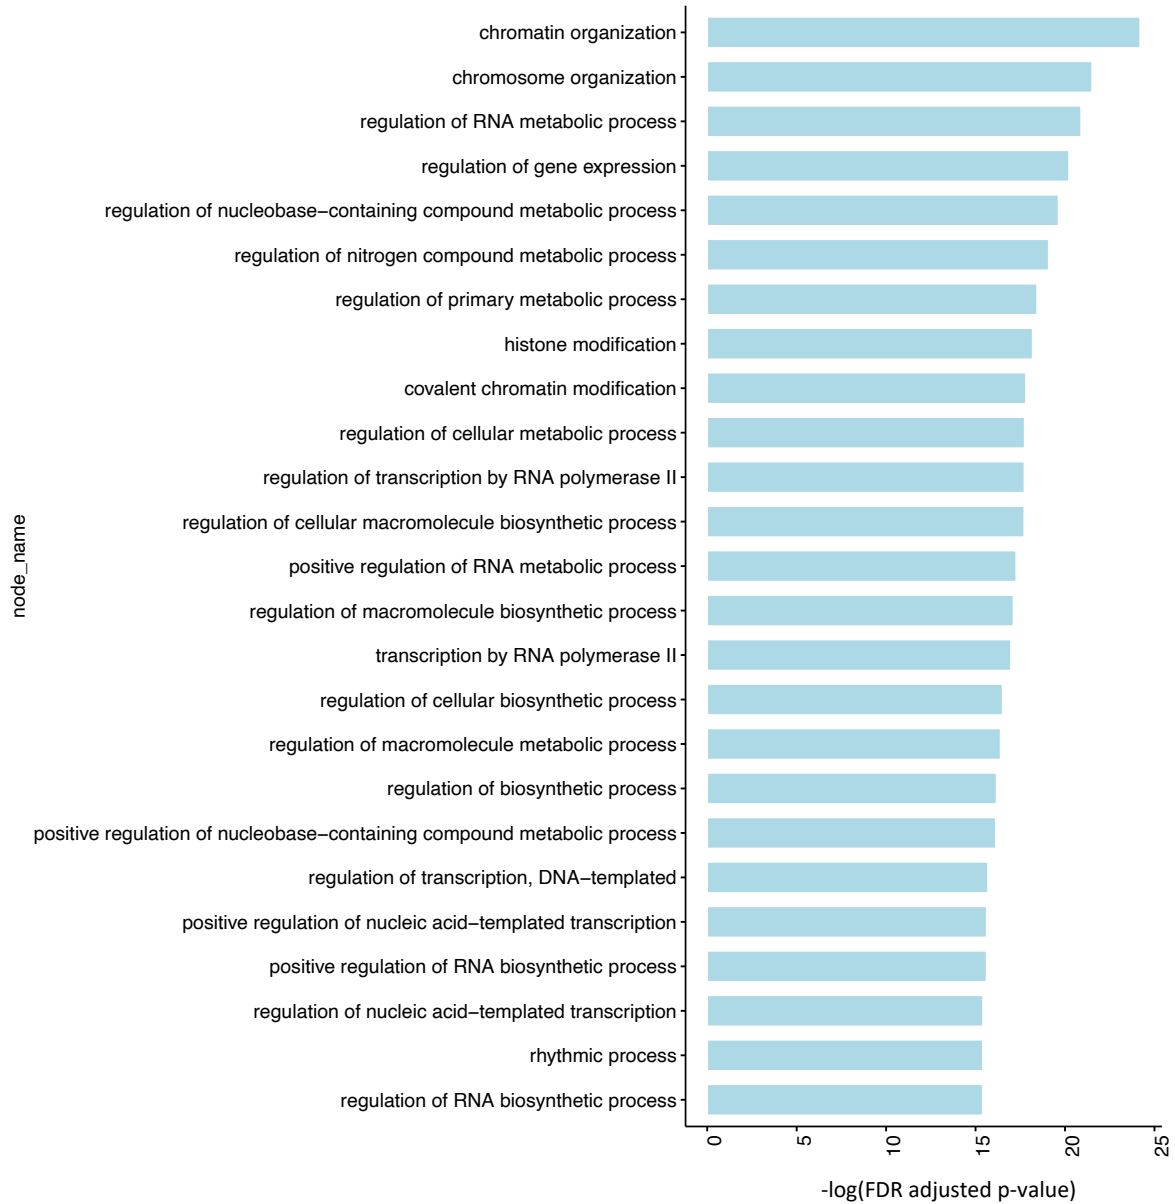

**Figure S43.** Genes in common among brain *NHIP*-associated (adjusted), cell line DGE, and SFARI ASD genes are enriched for histone modification and rhythmic process functions. GO term analysis was based on the common 30 genes among brain DGE, cell line DGE, and SFARI ASD genes. The bar plot was generated by the top 25 GO terms in the biological process category and shown enrichment with histone acetyltransferase.



p-value: 0.0099  
Z-score: 12.61  
n perm: 100  
randomization: randomizeRegions

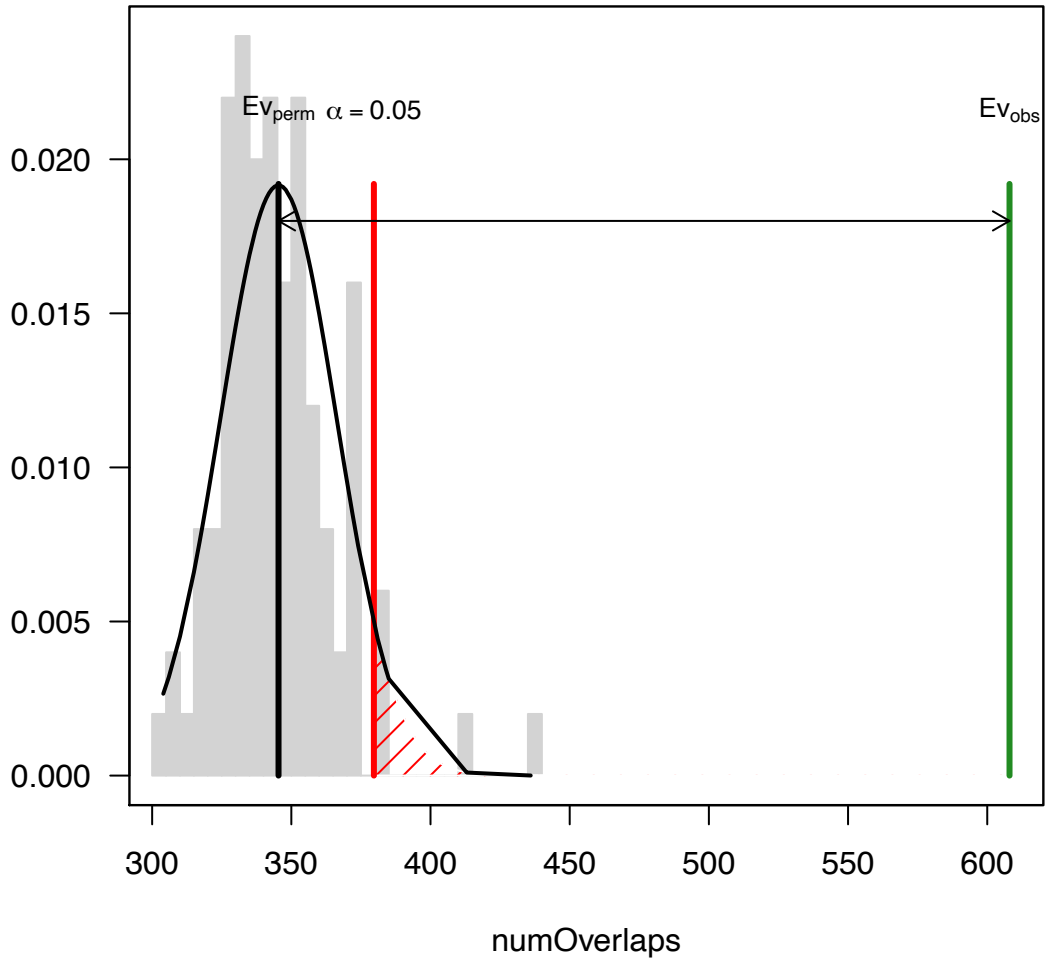

**Figure S44.** CoRSIV regions significantly overlapped with SV hotspots. Analysis was performed using the regioner R package with 100 permutation tests to show the significant overlapping between CoRSIV regions and SV hotspots.
