# Supplementary material for: Placental methylome reveals a 22q13.33 brain regulatory gene locus associated with autism
Source: Genome Biol. 2022 Feb 16;23:46. doi: 10.1186/s13059-022-02613-1 (PMC8848662; doi:10.1186/s13059-022-02613-1)
Supplement: Supplementary file 15 — Additional file 15: Table S14. PRS was tested for association on 22q13.33 comethylated block % methylation or diagnosis. [file 13059_2022_2613_MOESM15_ESM.xlsx]

## Sheet: Sheet1
Analysis: Association between 22q13.33 block percent methylation and polygenic risk score (PRS)
Effect	Estimate	SE	t value	p-value
Intercept	0.6326	0.3149	2.009	0.05111
PRS	-0.2994	3.0813	-0.097	0.9229
Analysis: Association between Diagnosis and PRS
Effect	Estimate	SE	t value	p-value
Intercept	1.394	2.547	0.547	0.586
PRS	9.044	24.924	0.363	0.718
Analysis: Association between 22q13.33 block percent methylation and Diagnosis, insertion genotype, prenatal vitamin use in first month of pregnancy, and PRS
Effect	Estimate	SE	t value	p-value
Intercept	0.05317	0.05966	0.891	0.376
Diagnosis	-0.04133	0.01435	-2.88	0.0055	**
Insertion	-0.03854	0.01459	-2.641	0.0105	*
Prenatal Vitamin Intake during First Month of Pregnancy	0.06247	0.059	1.059	0.2939
PRS	1.00749	2.95541	0.341	0.7344
